# Supplementary material
Source: ML conference proceedings conference paper supplement (https://openreview.net/forum?id=jXgbJdQ2YIy)
Supplement: supplementary_material [file attachment]

---

# Supplementary Material of “Escaping from the Barren Plateau via Gaussian Initializations in Deep Variational Quantum Circuits”

---

Anonymous Author(s)

Affiliation

Address

email

1 This supplementary material contains four parts:

- 2 • Section A provides some additional experiment results.
- 3 • Section B provides some technical lemmas which are useful for proving main theorems in
- 4 this work.
- 5 • Section C provides the proof of Theorem 4.1.
- 6 • Section D provides the proof of Theorem 4.2.

## 7 A Additional Experiments

### 8 A.1 Heisenberg model

9 In this section, we introduce additional experiment results toward finding the ground state energy of  
10 the Heisenberg model with different circuit depths and optimizers. We follow simulation details in  
11 the main text.

12 First, we consider the effect of different circuit depths and Gaussian initializations with different  
13 variances. The loss function has the formulation Eq. (10) with the number of qubits  $N = 15$ . We  
14 adopt the ansatz circuit 1 with  $L_1 \in \{8, 10, 12\}$  layers of  $R_Y R_X CZ$  blocks, which correspond with  
15  $L \in \{14, 18, 22\}$  case of Theorem 4.1, respectively. In the experiment, we train VQAs using gradient  
16 descent with the learning rate 0.01. Since the estimation of gradients on real quantum computers  
17 could be perturbed by statistical measurement noise, we compare optimizations using accurate and  
18 noisy gradients. For the latter case, we set the variance of measurement noises to be 0.01. We train  
19 different Gaussian initialized VQAs with variances  $\{0.01\gamma, 0.1\gamma, \gamma, 10\gamma, 100\gamma\}$ , where the value  $\gamma$   
20 follows the formulation in Theorem 4.1.

21 We illustrate results in Figures 1 and 2, which correspond to the noiseless and the noisy case, re-  
22 spectively. As show in figures of the loss during optimizations, the Gaussian initialization with the  
23 variance  $\gamma$  outperforms other Gaussian initializations with faster convergence rates. Gaussian initial-  
24 izations with small variances  $\{0.01\gamma, 0.1\gamma\}$  have similar performances with the zero initialization  
25 for the noisy training case, and Gaussian initializations with large variances  $\{10\gamma, 100\gamma\}$  behave  
26 similarly with the uniform initialization presented in the main text. Moreover, circuits initialized  
27 with larger variances  $\{10\gamma, 100\gamma\}$  need more iterations to converge when the depth increases, while  
28 circuits with variances  $\{0.01\gamma, 0.1\gamma, \gamma\}$  show similar convergence rates for different depths.

29 Next, we compare different initializations with other optimizers, i.e., the gradient descent with  
30 momentum [1], the Nesterov accelerated gradient (NAG) [2], and the adaptive gradient (AdaGrad) [3].  
31 We follow the loss function (10) with  $(N, L) = (15, 18)$  and  $(N, L) = (18, 38)$ . The learning rate and  
32 the noise are the same as that in the experiment considering different Gaussian variances. We illustrate  
33 results in Figures 3 and 4. As shown in Figure 3 and Figure 1 in the main text, the performance of

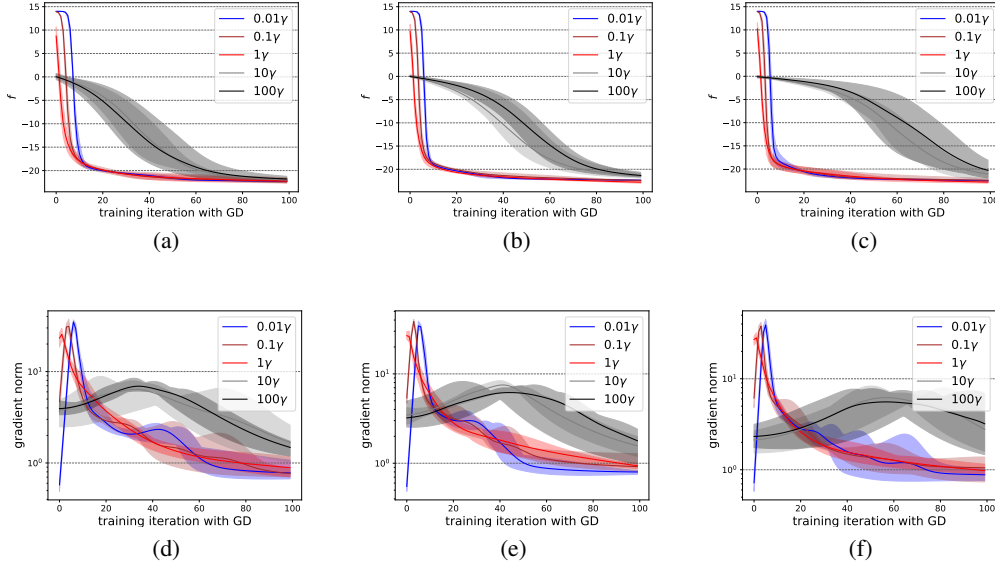

Figure 1: Numerical results of finding the ground state energy of the Heisenberg model using the noiseless gradient descent. Figures 1(a)-1(c) show the loss during optimizations for different  $L \in \{14, 18, 22\}$  using the circuit 1 in the main text. For each  $L$ , we adopt Gaussian initializations with different variances  $0.01\gamma, 0.1\gamma, \gamma, 10\gamma, 100\gamma$ , where the value  $\gamma$  follows the formulation in Theorem 4.1. Figures 1(d)-1(f) show the  $\ell_2$  norm of corresponding gradients during the optimization. Each line illustrates the average of 5 rounds of independent experiments.

GD with momentum and the NAG is similar to that of the Adam optimizer, while the performance of the AdaGrad is similar to the GD optimizer. By comparing Figures 3 and 4, we notice that uniformly initialized circuits converge slower when the qubit number and the circuit depth increase.

## A.2 Quantum chemistry

In this section, we introduce additional experiment results toward finding the ground state energy of the Heisenberg model with different circuit depths. We repeat the LiH task in the main text with the depth  $L \in \{24, 48, 72\}$  by stacking the circuit  $V_{\text{Givens}}$  in Eq. (11). The noise setting follows the adaptive noise with the variance in Eq. (12). We adopt gradient descent and the Adam optimizer with learning rates 0.1 and 0.01, respectively. The result is shown in Figure 5. For the gradient descent case, the convergence rate of the loss function increases when the circuit depth grows. For the Adam case, circuits with different depths show similar convergence speeds.

## B Technical Lemmas

In this section, we provide some technical lemmas.

**Lemma B.1.** *Let  $\theta$  be a variable with Gaussian distribution  $\mathcal{N}(0, \gamma^2)$ . Let  $\rho = \sum_k c_k \rho_k$  be the linear combination of density matrices  $\{\rho_k\}$  with real coefficients  $\{c_k\}$ . Let  $G$  be a hermitian unitary and  $V = e^{-i\theta G}$ . Let  $O$  be an arbitrary hermitian quantum observable that anti-commutes with  $G$ . Then*

$$\mathbb{E}_{\theta \sim \mathcal{N}(0, \gamma^2)} \text{Tr} [OV\rho V^\dagger]^2 \geq (1 - 4\gamma^2) \text{Tr} [O\rho]^2 + 4\gamma^2(1 - 4\gamma^2) \text{Tr} [iGO\rho]^2. \quad (1)$$

*Proof.* By replacing the term

$$V = e^{-i\theta G} = I \cos \theta - iG \sin \theta,$$

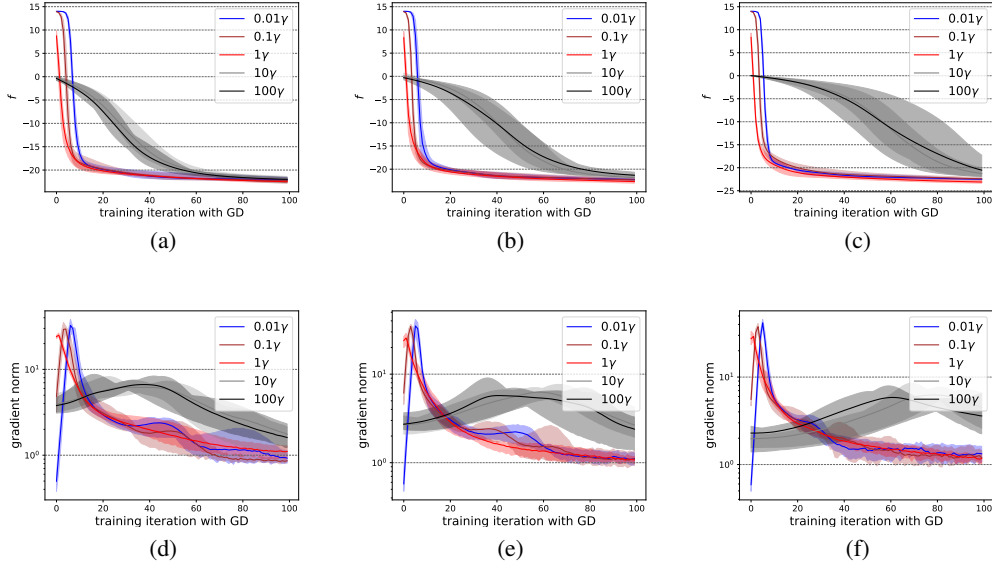

Figure 2: Numerical results of finding the ground state energy of the Heisenberg model using the noisy gradient descent. Figures 2(a)-2(c) show the loss during optimizations for different  $L \in \{14, 18, 22\}$  using the circuit 1 in the main text. For each  $L$ , we adopt Gaussian initializations with different variances  $0.01\gamma, 0.1\gamma, \gamma, 10\gamma, 100\gamma$ , where the value  $\gamma$  follows the formulation in Theorem 4.1. Figures 2(d)-2(f) show the  $\ell_2$  norm of corresponding gradients during the optimization. Each line illustrates the average of 5 rounds of independent experiments.

we have

$$\begin{aligned} \text{Tr}[OV\rho V^\dagger] &= \text{Tr}[O(I \cos \theta - iG \sin \theta)\rho(I \cos \theta + iG \sin \theta)] \\ &= \cos 2\theta \text{Tr}[O\rho] + \sin 2\theta \text{Tr}[iGO\rho], \end{aligned} \quad (2)$$

where Eq. (2) follows from the condition  $OG + GO = 0$ . Since  $O$  anti-commutes with  $G$ ,  $iGO$  could be served as a hermitian observable. Based on Eq. (2), we have

$$\begin{aligned} \mathbb{E}_{\theta \sim \mathcal{N}(0, \gamma^2)} \text{Tr}[OV\rho V^\dagger]^2 &= \mathbb{E}_{\theta \sim \mathcal{N}(0, \gamma^2)} \left( \cos 2\theta \text{Tr}[O\rho] + \sin 2\theta \text{Tr}[iGO\rho] \right)^2 \\ &= \frac{1 + e^{-8\gamma^2}}{2} \text{Tr}[O\rho]^2 + \frac{1 - e^{-8\gamma^2}}{2} \text{Tr}[iGO\rho]^2 \end{aligned} \quad (3)$$

$$\geq (1 - 4\gamma^2) \text{Tr}[O\rho]^2 + 4\gamma^2(1 - 4\gamma^2) \text{Tr}[iGO\rho]^2, \quad (4)$$

where Eq. (3) is obtained by calculating expectation terms. InEq. (4) holds since  $1 - 8\gamma^2 \leq e^{-8\gamma^2} \leq 1 - 8\gamma^2 + 32\gamma^4$ . Thus, we have proved Eq. (1).

□

**Lemma B.2.** Let  $\theta$  be a variable with Gaussian distribution  $\mathcal{N}(0, \gamma^2)$ . Let  $\rho$  be the density matrix of a quantum state. Let  $G$  be a hermitian unitary and  $V = e^{-i\theta G}$ . Let  $O$  be an arbitrary hermitian quantum observable that anti-commutes with  $G$ . Then

$$\mathbb{E}_{\theta \sim \mathcal{N}(0, \gamma^2)} \left( \frac{\partial}{\partial \theta} \text{Tr}[OV\rho V^\dagger] \right)^2 \geq (1 - 4\gamma^2) \left( \frac{\partial}{\partial \theta} \text{Tr}[OV\rho V^\dagger] \right)^2 \Big|_{\theta=0} + 16\gamma^2(1 - 4\gamma^2) \text{Tr}[O\rho]^2. \quad (5)$$

*Proof.* By calculating the gradient for both sides of Eq. (2), we obtain

$$\frac{\partial}{\partial \theta} \text{Tr}[OV\rho V^\dagger] = -2 \sin 2\theta \text{Tr}[O\rho] + 2 \cos 2\theta \text{Tr}[iGO\rho]. \quad (6)$$

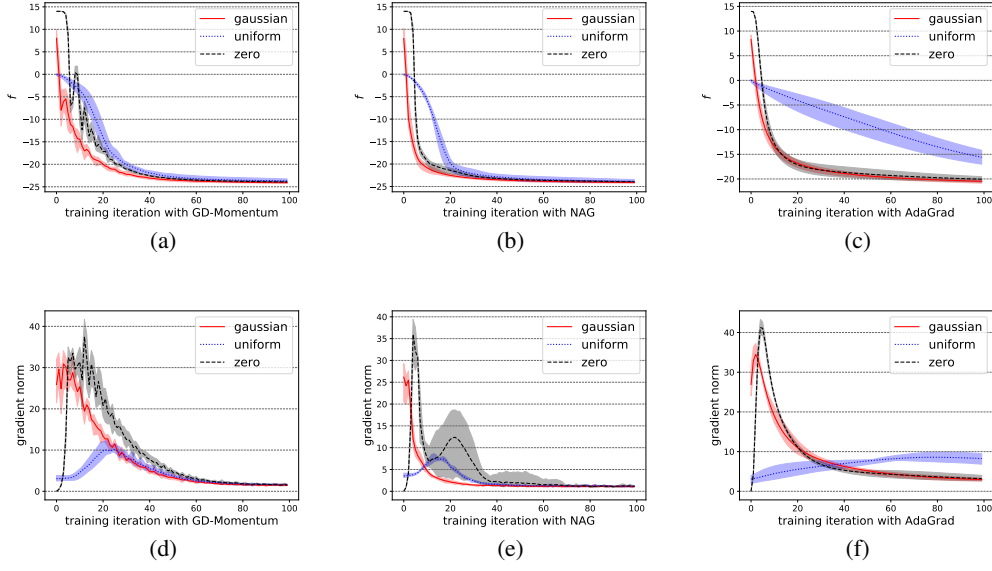

Figure 3: Numerical results of finding the ground state energy of the Heisenberg model with qubits  $N = 15$  (noisy case). Figures 3(a)-3(c) show the loss during optimizations using the gradient descent with momentum, the Nesterov accelerated gradient (NAG), and the adaptive gradient (AdaGrad), respectively. Figures 3(d)-3(f) show the  $\ell_2$  norm of gradients during the optimization. Each line illustrates the average of 5 rounds of independent experiments.

62 Let  $\theta = 0$  in Eq. (6), we obtain

$$\frac{\partial}{\partial \theta} \text{Tr} [OV\rho V^\dagger] \Big|_{\theta=0} = 2\text{Tr} [iGO\rho]. \quad (7)$$

63 Now we proceed to prove Lemma B.2.

$$\begin{aligned} \text{The left part of Eq. (5)} &= \mathbb{E}_{\theta \sim \mathcal{N}(0, \gamma^2)} (-2 \sin 2\theta \text{Tr} [O\rho] + 2 \cos 2\theta \text{Tr} [iGO\rho])^2 \\ &= 2(1 - e^{-8\gamma^2}) \text{Tr} [O\rho]^2 + 2(1 + e^{-8\gamma^2}) \text{Tr} [iGO\rho]^2 \end{aligned} \quad (8)$$

$$\geq 16\gamma^2(1 - 4\gamma^2) \text{Tr} [O\rho]^2 + 4(1 - 4\gamma^2) \text{Tr} [iGO\rho]^2 \quad (9)$$

$$= (1 - 4\gamma^2) \left( \frac{\partial}{\partial \theta} \text{Tr} [OV\rho V^\dagger] \right)^2 \Big|_{\theta=0} + 16\gamma^2(1 - 4\gamma^2) \text{Tr} [O\rho]^2. \quad (10)$$

64 Eq. (8) is obtained by calculating expectation terms. In Eq. (9) is obtained by using  $1 - 8\gamma^2 \leq$   
 65  $e^{-8\gamma^2} \leq 1 - 8\gamma^2 + 32\gamma^4$ . Eq. (10) follows from Eq. (7). Thus, we have proved Eq. (5).

66  $\square$

67 **Lemma B.3.** Denote by  $\rho = \sum_k c_k \rho_k$  the linear combination of density matrices  $\{\rho_k\}$  with real  
 68 coefficients  $\{c_k\}$ . Let  $V_h(\theta) = W_1 e^{-i\theta G_1} W_2 \cdots W_h e^{-i\theta G_h}$ , where  $\{G_n\}_{n=1}^h$  is a list of hermitian  
 69 unitaries and  $\{W_n\}_{n=1}^h$  is a list of unitary matrices. Denote by  $O$  an arbitrary hermitian quantum  
 70 observable. Then

$$\mathbb{E}_{\theta \sim \mathcal{N}(0, \gamma^2)} \text{Tr} [OV_h(\theta) \rho V_h(\theta)^\dagger]^2 \geq \text{Tr} [OV_h(0) \rho V_h(0)^\dagger]^2 - [12h(h-1) + 4] \gamma^2 \|c\|_1^2 \|O\|_2^2, \quad (11)$$

71 where  $\|c\|_1 = \sum_k |c_k|$  denotes the  $\ell_1$  norm of  $c$ ,  $\|O\|_2$  denotes the spectral norm of  $O$ , and the  
 72 variance  $\gamma^2 \leq \frac{1}{12h^2}$ .

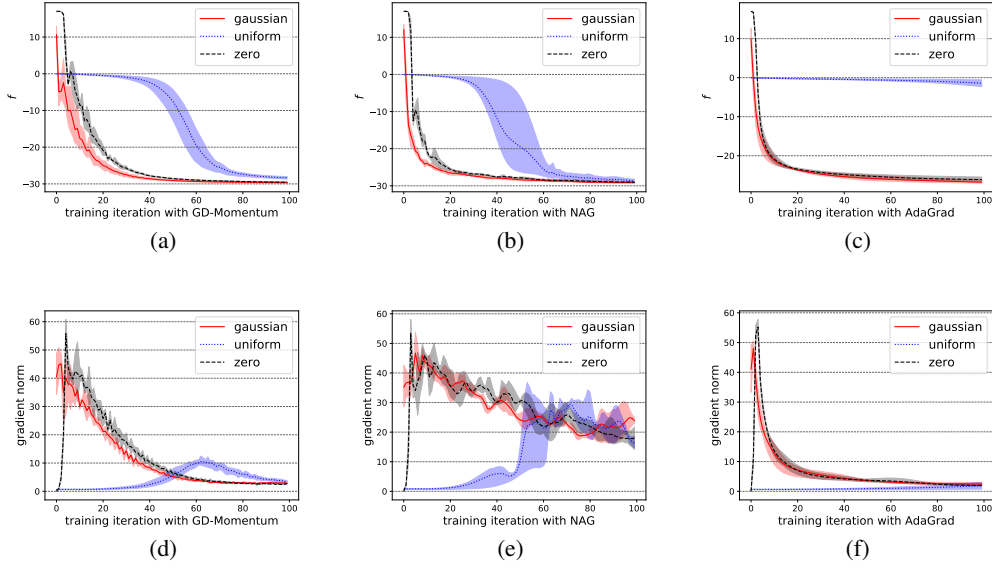

Figure 4: Numerical results of finding the ground state energy of the Heisenberg model with qubits  $N = 18$  (noisy case). Figures 4(a)-4(c) show the loss during optimizations using the gradient descent with momentum, the Nesterov accelerated gradient (NAG), and the adaptive gradient (AdaGrad), respectively. Figures 4(d)-4(f) show the  $\ell_2$  norm of gradients during the optimization. Each line illustrates the average of 3 rounds of independent experiments.

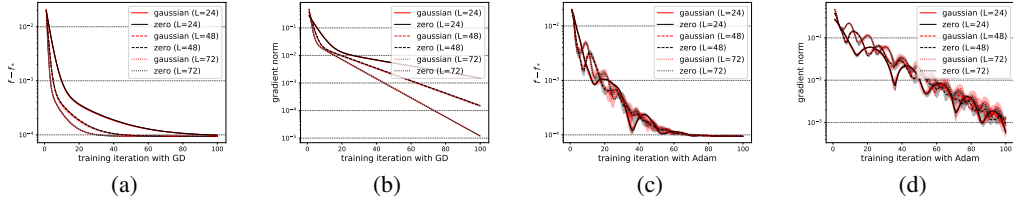

Figure 5: Numerical results of finding the ground state energy of the LiH molecule using noisy gradients. Figures 5(a) and 5(c) show the loss during optimizations for different  $L \in \{24, 48, 72\}$  with the gradient descent and the Adam optimizer, respectively. Figures 5(b) and 5(d) show the  $\ell_2$  norm of gradients during the optimization. Each line illustrates the average of 3 rounds of independent experiments.

73 *Proof.* Before the proof, we define several notations for convenience. We define  $V_0 = I$  and

$$V_j(\theta) = W_{h+1-j} e^{-i\theta G_{h+1-j}} \dots W_h e^{-i\theta G_h}, \forall j \in \{1, \dots, h\}. \quad (12)$$

74 We denote  $\mathbf{0}_k$ ,  $\mathbf{1}_k$ , and  $\mathbf{2}_k$  as  $k$ -dimensional vectors with components 0, 1, and 2, respectively. We  
 75 define  $O_{i_1, \dots, i_k}^{j_1, \dots, j_k} = O$  for the  $k = 0$  case and

$$O_{i_1, \dots, i_k}^{j_1, \dots, j_k} = \begin{cases} W_k^\dagger O_{i_1, \dots, i_{k-1}}^{j_1, \dots, j_{k-1}} W_k, & \text{if } i_k = 0, j_k = 0, \\ \frac{1}{2} G_k \left\{ G_k, W_k^\dagger O_{i_1, \dots, i_{k-1}}^{j_1, \dots, j_{k-1}} W_k \right\}, & \text{if } i_k = 1, j_k = 0, \\ \frac{1}{2} G_k \left[ G_k, W_k^\dagger O_{i_1, \dots, i_{k-1}}^{j_1, \dots, j_{k-1}} W_k \right], & \text{if } i_k = 2, j_k = 0, \\ i G_k O_{i_1, \dots, i_{k-1}, i_k}^{j_1, \dots, j_{k-1}, 0}, & \text{if } j_k = 1, \end{cases} \quad (13)$$

76 for increasing  $k \in \{1, \dots, h\}$ , where  $i_k \in \{0, 1, 2\}$  and  $j_k \in \{0, 1\}$ .

77 For all  $1 \leq k \leq \ell \leq h$ , the definition (13) provides the commuting and anti-commuting parts of  
 78  $O_{i_1, \dots, i_{k-1}, 0, j_{k+1}, \dots, j_\ell}^{j_1, \dots, j_{k-1}, 0, j_{k+1}, \dots, j_\ell}$  with respect to  $G_k$ , respectively, i.e.,

$$\begin{aligned} O_{i_1, \dots, i_{k-1}, 0, j_{k+1}, \dots, j_\ell}^{j_1, \dots, j_{k-1}, 0, j_{k+1}, \dots, j_\ell} &= O_{i_1, \dots, i_{k-1}, 1, j_{k+1}, \dots, j_\ell}^{j_1, \dots, j_{k-1}, 0, j_{k+1}, \dots, j_\ell} + O_{i_1, \dots, i_{k-1}, 2, j_{k+1}, \dots, j_\ell}^{j_1, \dots, j_{k-1}, 0, j_{k+1}, \dots, j_\ell}, \\ G_k O_{i_1, \dots, i_{k-1}, 1, j_{k+1}, \dots, j_\ell}^{j_1, \dots, j_{k-1}, 0, j_{k+1}, \dots, j_\ell} &= O_{i_1, \dots, i_{k-1}, 1, j_{k+1}, \dots, j_\ell}^{j_1, \dots, j_{k-1}, 0, j_{k+1}, \dots, j_\ell} G_k, \\ G_k O_{i_1, \dots, i_{k-1}, 2, j_{k+1}, \dots, j_\ell}^{j_1, \dots, j_{k-1}, 0, j_{k+1}, \dots, j_\ell} &= -O_{i_1, \dots, i_{k-1}, 2, j_{k+1}, \dots, j_\ell}^{j_1, \dots, j_{k-1}, 0, j_{k+1}, \dots, j_\ell} G_k. \end{aligned}$$

79 Since for all  $k \in [L]$ ,  $G_k$  is a unitary matrix,  $O_i^j$  is a hermitian observable for all  $i \in \{0, 1, 2\}^\ell$ ,  
 80  $j \in \{0, 1\}^\ell$ , and  $\ell \in [L]$ . Meanwhile, the spectral norm of  $O_i^j$  is bounded,

$$\begin{aligned} \left\| O_{i_1, \dots, i_{h-1}, i_h}^{j_1, \dots, j_{h-1}, j_h} \right\|_2 &\leq \left\| O_{i_1, \dots, i_{h-1}, 0}^{j_1, \dots, j_{h-1}, 0} \right\|_2 \leq \frac{1}{2} \left\| O_{i_1, \dots, i_{h-1}, 0}^{j_1, \dots, j_{h-1}, 0} \right\|_2 + \frac{1}{2} \left\| O_{i_1, \dots, i_{h-1}, 0}^{j_1, \dots, j_{h-1}, 0} \right\|_2 \\ &= \left\| O_{i_1, \dots, i_{h-1}, 0}^{j_1, \dots, j_{h-1}, 0} \right\|_2 = \left\| O_{i_1, \dots, i_{h-1}}^{j_1, \dots, j_{h-1}} \right\|_2 \leq \|O\|_2, \end{aligned} \quad (14)$$

81 where  $\|A\|_2$  denotes the spectral norm of the matrix  $A$ . Moreover, for all  $k, \ell \geq 0$  such that  $k + \ell \leq h$ ,  
 82 the observable  $O_{i_1, \dots, i_k, 0_{h-k-\ell}, i_{h-\ell+1}, \dots, i_h}^{j_1, \dots, j_k, 0_{h-k-\ell}, j_{h-\ell+1}, \dots, j_h}$  could be recovered by

$$\sum_{n=k+1}^{h-\ell} \sum_{i_n=1}^2 O_{i_1, \dots, i_k, i_{h-k-\ell}, i_{h-\ell+1}, \dots, i_h}^{j_1, \dots, j_k, 0_{h-k-\ell}, j_{h-\ell+1}, \dots, j_h} = O_{i_1, \dots, i_k, 0_{h-k-\ell}, i_{h-\ell+1}, \dots, i_h}^{j_1, \dots, j_k, 0_{h-k-\ell}, j_{h-\ell+1}, \dots, j_h}. \quad (15)$$

Now we begin the proof. To analyze the expectation with respect to the parameter  $\theta$ , we need the detailed formulation of  $\text{Tr} [O V_h \rho V_h^\dagger]$  as the function of  $\theta$ . In fact, for all  $h' \in \{0, 1, \dots, h\}$  and all

$$i \in \{0, 1, 2\}^{h-h'}, j \in \{0, 1\}^{h-h'},$$

83 we have

$$\text{Tr} [O_i^j V_{h'} \rho V_{h'}^\dagger] = \sum_{j'=0_{h'}}^{1_{h'}} \sum_{i'=j'+1_{h'}}^{2_{h'}} (\cos 2\theta)^{\|i'\|_1 - \|j'\|_1 - h'} (\sin 2\theta)^{\|j'\|_1} \text{Tr} [O_{i, i'}^{j, j'} \rho], \quad (16)$$

84 where  $\|i'\|_1 \equiv \sum_{k=1}^{\dim(i')} |i'_k|$  denotes the  $\ell_1$  norm of the vector  $i$ .

Eq. (16) can be proved inductively. First, for the case  $h' = 0$ , Eq. (16) holds trivially. Next, we assume that Eq. (16) holds for the  $h' = k$  case. Then for all

$$i \in \{0, 1, 2\}^{h-k-1}, j \in \{0, 1\}^{h-k-1},$$

85 we have

$$\begin{aligned} \text{Tr} [O_i^j V_{k+1} \rho V_{k+1}^\dagger] &= \text{Tr} [O_i^j W_{h-k} (I \cos \theta - i G_{h-k} \sin \theta) V_k \rho V_k^\dagger (I \cos \theta + i G_{h-k} \sin \theta) W_{h-k}^\dagger] \\ &= \cos^2 \theta \text{Tr} [O_{i,0}^{j,0} V_k \rho V_k^\dagger] + \sin^2 \theta \text{Tr} [G_{h-k} O_{i,0}^{j,0} G_{h-k} V_k \rho V_k^\dagger] \\ &\quad + \sin \theta \cos \theta \text{Tr} [i G_{h-k} O_{i,0}^{j,0} V_k \rho V_k^\dagger] - \sin \theta \cos \theta \text{Tr} [O_{i,0}^{j,0} i G_{h-k} V_k \rho V_k^\dagger] \end{aligned} \quad (17)$$

$$= \text{Tr} [O_{i,1}^{j,0} V_k \rho V_k^\dagger] + \cos 2\theta \text{Tr} [O_{i,2}^{j,0} V_k \rho V_k^\dagger] + \sin 2\theta \text{Tr} [O_{i,2}^{j,1} V_k \rho V_k^\dagger], \quad (18)$$

86 where Eqs. (17) and (18) are derived by using the definition (13). We proceed by employing the  
 87  $h' = k$  case of Eq. (16), such that

$$\begin{aligned} \text{Eq. (18)} &= \sum_{j'=0_k}^{1_k} \sum_{i'=j'+1_k}^{2_k} (\cos 2\theta)^{\|i'\|_1 - \|j'\|_1 - k} (\sin 2\theta)^{\|j'\|_1} \text{Tr} [O_{i,1}^{j,0,j'} \rho] \\ &\quad + \cos 2\theta \sum_{j'=0_k}^{1_k} \sum_{i'=j'+1_k}^{2_k} (\cos 2\theta)^{\|i'\|_1 - \|j'\|_1 - k} (\sin 2\theta)^{\|j'\|_1} \text{Tr} [O_{i,2}^{j,0,j'} \rho] \end{aligned}$$

$$\begin{aligned}
& + \sin 2\theta \sum_{j'=0_k}^{1_k} \sum_{i'=j'+1_k}^{2_k} (\cos 2\theta)^{\|i'\|_1 - \|j'\|_1 - k} (\sin 2\theta)^{\|j'\|_1} \text{Tr} \left[ O_{i,2,i'}^{j,1,j'} \rho \right] \\
& = \sum_{j'=0_{k+1}}^{1_{k+1}} \sum_{i'=j'+1_{k+1}}^{2_{k+1}} (\cos 2\theta)^{\|i'\|_1 - \|j'\|_1 - k - 1} (\sin 2\theta)^{\|j'\|_1} \text{Tr} \left[ O_{i,i'}^{j,j'} \rho \right], \quad (19)
\end{aligned}$$

88 which matches the formulation of the  $h' = k + 1$  case of Eq. (16). Thus, Eq. (16) has been proved.

89 Now we begin to prove Eq. (11). Employing the  $h' = h$  case of Eq. (16) could yield

$$\begin{aligned}
& \mathbb{E}_{\theta \sim \mathcal{N}(0, \gamma^2)} \left( \text{Tr} \left[ O V_h \rho V_h^\dagger \right] \right)^2 \\
& = \mathbb{E}_{\theta \sim \mathcal{N}(0, \gamma^2)} \left( \sum_{j=0_h}^{1_h} \sum_{i=j+1_h}^{2_h} (\cos 2\theta)^{\|i\|_1 - \|j\|_1 - h} (\sin 2\theta)^{\|j\|_1} \text{Tr} \left[ O_i^j \rho \right] \right)^2 \quad (20)
\end{aligned}$$

$$\begin{aligned}
& = \mathbb{E}_{\theta \sim \mathcal{N}(0, \gamma^2)} \left( \sum_{i=1_h}^{2_h} (\cos 2\theta)^{\|i\|_1 - h} \text{Tr} \left[ O_i^{0_h} \rho \right] + \sum_{j>0_h}^{1_h} \sum_{i=j+1_h}^{2_h} (\cos 2\theta)^{\|i\|_1 - \|j\|_1 - h} (\sin 2\theta)^{\|j\|_1} \text{Tr} \left[ O_i^j \rho \right] \right)^2 \quad (21)
\end{aligned}$$

$$\begin{aligned}
& \geq \mathbb{E}_{\theta \sim \mathcal{N}(0, \gamma^2)} \left( \sum_{i=1_h}^{2_h} (\cos 2\theta)^{\|i\|_1 - h} \text{Tr} \left[ O_i^{0_h} \rho \right] \right)^2 \\
& + 2 \mathbb{E}_{\theta \sim \mathcal{N}(0, \gamma^2)} \sum_{j>0_h}^{1_h} \sum_{i=j+1_h}^{2_h} (\cos 2\theta)^{\|i\|_1 - \|j\|_1 - h} (\sin 2\theta)^{\|j\|_1} \text{Tr} \left[ O_i^j \rho \right] \sum_{i'=1_h}^{2_h} (\cos 2\theta)^{\|i'\|_1 - h} \text{Tr} \left[ O_{i'}^{0_h} \rho \right]. \quad (22)
\end{aligned}$$

90 In Eq. (22) is obtained by discarding the square of the latter term in the bracket of Eq. (21). We remark  
91 that if Eqs. (23) and (24) hold, we can prove Eq. (11) by using Eqs. (20-22).

$$\begin{aligned}
& \mathbb{E}_{\theta \sim \mathcal{N}(0, \gamma^2)} \left( \sum_{i=1_h}^{2_h} (\cos 2\theta)^{\|i\|_1 - h} \text{Tr} \left[ O_i^{0_h} \rho \right] \right)^2 - \left( \text{Tr} \left[ O V_h(0) \rho V_h(0)^\dagger \right] \right)^2 \geq -(6h - 2)\gamma^2 \|c\|_1^2 \|O\|_2^2, \quad (23)
\end{aligned}$$

92

$$\begin{aligned}
& \mathbb{E}_{\theta \sim \mathcal{N}(0, \gamma^2)} \sum_{j>0_h}^{1_h} \sum_{i=j+1_h}^{2_h} (\cos 2\theta)^{\|i\|_1 - \|j\|_1 - h} (\sin 2\theta)^{\|j\|_1} \text{Tr} \left[ O_i^j \rho \right] \sum_{i'=1_h}^{2_h} (\cos 2\theta)^{\|i'\|_1 - h} \text{Tr} \left[ O_{i'}^{0_h} \rho \right] \\
& \geq -(6h^2 - 9h + 3)\gamma^2 \|c\|_1^2 \|O\|_2^2. \quad (24)
\end{aligned}$$

93 In the following proof, we would derive Eqs. (23) and (24). We focus on the Eq. (23) first. In fact,  
94 the left side of Eq. (23) is bounded by

$$\begin{aligned}
& \mathbb{E}_{\theta \sim \mathcal{N}(0, \gamma^2)} \left( \sum_{i=1_h}^{2_h} \left[ 1 - (\cos 2\theta)^{\|i\|_1 - h} - 1 \right] \text{Tr} \left[ O_i^{0_h} \rho \right] \right)^2 - \left( \text{Tr} \left[ O_{0_h}^{0_h} \rho \right] \right)^2 \quad (25)
\end{aligned}$$

$$\begin{aligned}
& = \mathbb{E}_{\theta \sim \mathcal{N}(0, \gamma^2)} \left( \sum_{i=1_h}^{2_h} \left[ 1 - (\cos 2\theta)^{\|i\|_1 - h} - 1 \right] \text{Tr} \left[ O_i^{0_h} \rho \right] \right)^2 - \left( \sum_{i=1_h}^{2_h} \text{Tr} \left[ O_i^{0_h} \rho \right] \right)^2 \quad (26)
\end{aligned}$$

$$\begin{aligned}
& \geq -2 \left| \sum_{i=1_h}^{2_h} \text{Tr} \left[ O_i^{0_h} \rho \right] \right| \mathbb{E}_{\theta \sim \mathcal{N}(0, \gamma^2)} \left| \sum_{i=1_h}^{2_h} \left[ 1 - (\cos 2\theta)^{\|i\|_1 - h} \right] \text{Tr} \left[ O_i^{0_h} \rho \right] \right| \quad (27)
\end{aligned}$$

$$\begin{aligned}
& = -2 \left| \text{Tr} \left[ O_{0_h}^{0_h} \rho \right] \right| \mathbb{E}_{\theta \sim \mathcal{N}(0, \gamma^2)} \left| \sum_{i=1_h}^{2_h} \left[ 1 - (\cos 2\theta)^{\|i\|_1 - h} \right] \text{Tr} \left[ O_i^{0_h} \rho \right] \right| \quad (28)
\end{aligned}$$

$$\geq -2\|\mathbf{c}\|_1\|O\|_2 \mathbb{E}_{\theta \sim \mathcal{N}(0, \gamma^2)} \left| \sum_{\mathbf{i}=\mathbf{1}_h}^{2_h} \left[1 - (\cos 2\theta)^{\|\mathbf{i}\|_1 - h}\right] \text{Tr} \left[O_{\mathbf{i}}^{\mathbf{0}_h} \rho\right] \right| \quad (29)$$

$$\geq -2\|\mathbf{c}\|_1^2\|O\|_2^2 \mathbb{E}_{\theta \sim \mathcal{N}(0, \gamma^2)} \left[ (2 - \cos 2\theta)^h - 1 \right]. \quad (30)$$

Eq. (25) is obtained by using the definition (13). Eq. (26) is derived by using Eq. (15). InEq. (27) is obtained by using  $(a-b)^2 - b^2 \geq -2|a| \cdot |b|$ . Eq. (28) yields from Eq. (15). InEq. (29) is derived by using

$$\left| \text{Tr} \left[ O_{\mathbf{i}}^j \rho \right] \right| = \left| \sum_k c_k \text{Tr} \left[ O_{\mathbf{i}}^j \rho_k \right] \right| \leq \sum_k |c_k| \left| \text{Tr} \left[ O_{\mathbf{i}}^j \rho_k \right] \right| \leq \sum_k |c_k| \left\| O_{\mathbf{i}}^j \right\|_2 \leq \|\mathbf{c}\|_1 \|O\|_2. \quad (31)$$

InEq. (30) is obtained by using the  $h' = h$  case of InEq. (32), i.e.,

$$\left| \sum_{\mathbf{i}'=\mathbf{j}'+\mathbf{1}_{h'}}^{2_{h'}} \left[ 1 - (\cos 2\theta)^{\|\mathbf{i}'\|_1 - \|\mathbf{j}'\|_1 - h'} \right] \text{Tr} \left[ O_{\mathbf{i}', \mathbf{i}}^{\mathbf{j}', \mathbf{j}} \rho \right] \right| \leq \left[ (2 - \cos 2\theta)^{h' - \|\mathbf{j}'\|_1} - 1 \right] \|\mathbf{c}\|_1 \|O\|_2 \quad (32)$$

for all  $h' \in \{0, 1, \dots, h\}$ ,  $\mathbf{j}' \in \{0, 1\}^{h'}$ ,  $\mathbf{i} \in \{0, 1, 2\}^{h-h'}$ , and  $\mathbf{j} \in \{0, 1\}^{h-h'}$ .

InEq. (32) can be proved inductively. First, for the case  $h' = 0$ , Eq. (32) holds trivially. Next we assume that Eq. (32) holds for the case  $h' = k$ . Then for all  $\mathbf{i} \in \{0, 1, 2\}^{h-k-1}$  and  $\mathbf{j} \in \{0, 1\}^{h-k-1}$ , we have

$$\begin{aligned} & \left| \sum_{\mathbf{i}'=\mathbf{j}'+\mathbf{1}_{k+1}}^{2_{k+1}} \left[ 1 - (\cos 2\theta)^{\|\mathbf{i}'\|_1 - \|\mathbf{j}'\|_1 - k-1} \right] \text{Tr} \left[ O_{\mathbf{i}', \mathbf{i}}^{\mathbf{j}', \mathbf{j}} \rho \right] \right| \\ &= \left| \sum_{\mathbf{i}'=\mathbf{j}'+\mathbf{1}_k}^{2_k} \sum_{\mathbf{i}'_{k+1}=\mathbf{j}'_{k+1}+1}^2 \left[ 1 - (\cos 2\theta)^{\|\mathbf{i}'\|_1 + \mathbf{i}'_{k+1} - \|\mathbf{j}'\|_1 - \mathbf{j}'_{k+1} - k-1} \right] \text{Tr} \left[ O_{\mathbf{i}', \mathbf{i}'_{k+1}, \mathbf{i}}^{\mathbf{j}', \mathbf{j}'_{k+1}, \mathbf{j}} \rho \right] \right|. \end{aligned} \quad (33)$$

For the case  $\mathbf{j}'_{k+1} = 1$ ,

$$\begin{aligned} \text{Eq. (33)} &= \left| \sum_{\mathbf{i}'=\mathbf{j}'+\mathbf{1}_k}^{2_k} \left[ 1 - (\cos 2\theta)^{\|\mathbf{i}'\|_1 - \|\mathbf{j}'\|_1 - k} \right] \text{Tr} \left[ O_{\mathbf{i}', 2, \mathbf{i}}^{\mathbf{j}', 1, \mathbf{j}} \rho \right] \right| \\ &\leq \left[ (2 - \cos 2\theta)^{k - \|\mathbf{j}'\|_1} - 1 \right] \|\mathbf{c}\|_1 \|O\|_2 \end{aligned} \quad (34)$$

$$= \left[ (2 - \cos 2\theta)^{k+1 - \|\mathbf{j}'\|_1 - \mathbf{j}'_{k+1}} - 1 \right] \|\mathbf{c}\|_1 \|O\|_2. \quad (35)$$

InEq. (34) is derived by using the  $h' = k$  case of InEq. (32). Eq. (35) is derived by using  $\mathbf{j}'_{k+1} = 1$ .

For the case  $\mathbf{j}'_{k+1} = 0$ ,

$$\begin{aligned} \text{Eq. (33)} &= \left| \sum_{\mathbf{i}'=\mathbf{j}'+\mathbf{1}_k}^{2_k} \left[ 1 - (\cos 2\theta)^{\|\mathbf{i}'\|_1 - \|\mathbf{j}'\|_1 - k} \right] \text{Tr} \left[ O_{\mathbf{i}', 1, \mathbf{i}}^{\mathbf{j}', 0, \mathbf{j}} \rho \right] \right. \\ &\quad \left. + \sum_{\mathbf{i}'=\mathbf{j}'+\mathbf{1}_k}^{2_k} \left[ 1 - (\cos 2\theta)^{\|\mathbf{i}'\|_1 - \|\mathbf{j}'\|_1 - k+1} \right] \text{Tr} \left[ O_{\mathbf{i}', 2, \mathbf{i}}^{\mathbf{j}', 0, \mathbf{j}} \rho \right] \right| \\ &= \left| \sum_{\mathbf{i}'=\mathbf{j}'+\mathbf{1}_k}^{2_k} \left[ 1 - (\cos 2\theta)^{\|\mathbf{i}'\|_1 - \|\mathbf{j}'\|_1 - k} \right] \text{Tr} \left[ O_{\mathbf{i}', 0, \mathbf{i}}^{\mathbf{j}', 0, \mathbf{j}} \rho \right] \right. \\ &\quad \left. + (1 - \cos 2\theta) \sum_{\mathbf{i}'=\mathbf{j}'+\mathbf{1}_k}^{2_k} \left[ (\cos 2\theta)^{\|\mathbf{i}'\|_1 - \|\mathbf{j}'\|_1 - k} - 1 + 1 \right] \text{Tr} \left[ O_{\mathbf{i}', 2, \mathbf{i}}^{\mathbf{j}', 0, \mathbf{j}} \rho \right] \right| \end{aligned} \quad (36)$$



$$\begin{aligned}
&\leq \left| \sum_{\mathbf{i}'=\mathbf{j}'+\mathbf{1}_k}^{\mathbf{2}_k} \left[ 1 - (\cos 2\theta)^{\|\mathbf{i}'\|_1 - \|\mathbf{j}'\|_1 - k} \right] \text{Tr} \left[ O_{\mathbf{i}',0,\mathbf{i}}^{\mathbf{j}',0,\mathbf{j}} \rho \right] \right| \\
&\quad + (1 - \cos 2\theta) \left| \sum_{\mathbf{i}'=\mathbf{j}'+\mathbf{1}_k}^{\mathbf{2}_k} \left[ 1 - (\cos 2\theta)^{\|\mathbf{i}'\|_1 - \|\mathbf{j}'\|_1 - k} \right] \text{Tr} \left[ O_{\mathbf{i}',2,\mathbf{i}}^{\mathbf{j}',0,\mathbf{j}} \rho \right] \right| \\
&\quad + (1 - \cos 2\theta) \left| \sum_{\mathbf{i}'=\mathbf{j}'+\mathbf{1}_k}^{\mathbf{2}_k} \text{Tr} \left[ O_{\mathbf{i}',2,\mathbf{i}}^{\mathbf{j}',0,\mathbf{j}} \rho \right] \right| \tag{37} \\
&\leq \left[ (2 - \cos 2\theta)^{k - \|\mathbf{j}'\|_1} - 1 \right] \|\mathbf{c}\|_1 \|O\|_2 + (1 - \cos 2\theta) \left[ (2 - \cos 2\theta)^{k - \|\mathbf{j}'\|_1} - 1 \right] \|\mathbf{c}\|_1 \|O\|_2 \\
&\quad + (1 - \cos 2\theta) \|\mathbf{c}\|_1 \|O\|_2 \tag{38} \\
&\leq \left[ (2 - \cos 2\theta)^{k+1 - \|\mathbf{j}'\|_1 - j'_{k+1}} - 1 \right] \|\mathbf{c}\|_1 \|O\|_2. \tag{39}
\end{aligned}$$

Eq. (36) is derived by using Eq. (15). InEq. (37) is obtained since  $|a + b| \leq |a| + |b|$ . InEq. (38) is obtained using the  $h' = k$  case of Eq. (32) and Eq. (15). InEq. (39) is derived by using Eq. (14). Thus we have proved Eq. (32) since Eqs. (35) and (39) match the  $h' = k + 1$  case.

Since  $\cos 2\theta \geq 1 - 2\theta^2$ , we could further bound Eq. (30) by

$$\text{Eq. (30)} \geq -2\|\mathbf{c}\|_1^2 \|O\|_2^2 \mathbb{E}_{\theta \sim \mathcal{N}(0, \gamma^2)} \left[ (1 + 2\theta^2)^h - 1 \right] \tag{40}$$

$$\begin{aligned}
&= -2\|\mathbf{c}\|_1^2 \|O\|_2^2 \mathbb{E}_{\theta \sim \mathcal{N}(0, \gamma^2)} \sum_{t=1}^h \binom{h}{t} (2\theta^2)^t \\
&= -2\|\mathbf{c}\|_1^2 \|O\|_2^2 \sum_{t=1}^h \binom{h}{t} (2t-1)!! (2\gamma^2)^t \tag{41}
\end{aligned}$$

$$\geq -2\|\mathbf{c}\|_1^2 \|O\|_2^2 \sum_{t=1}^h h(h-1)^{t-1} 2^{t-1} \left( \frac{1}{6h^2} \right)^{t-1} (2\gamma^2) \tag{42}$$

$$\begin{aligned}
&= -2\|\mathbf{c}\|_1^2 \|O\|_2^2 2h\gamma^2 \left[ 1 + \frac{h-1}{3h^2} \sum_{t=0}^{h-2} \left( \frac{h-1}{3h^2} \right)^t \right] \\
&\geq - (6h-2) \|\mathbf{c}\|_1^2 \|O\|_2^2 \gamma^2. \tag{43}
\end{aligned}$$

Eq. (41) is derived by calculating expectation terms. InEq. (42) yields from  $\frac{(2t-1)!!}{t!} \leq 2^{t-1}$  and the condition  $\gamma^2 \leq \frac{1}{12h^2}$ . Thus, we have proved InEq. (23).

Next, we focus on the Eq. (24). The left side of Eq. (24) could be bounded by

$$\begin{aligned}
&= \mathbb{E}_{\theta \sim \mathcal{N}(0, \gamma^2)} \sum_{\mathbf{j} > \mathbf{0}_{h,2} \mid \|\mathbf{j}\|_1}^{\mathbf{1}_h} \sum_{\mathbf{i}=\mathbf{j}+\mathbf{1}_h}^{\mathbf{2}_h} (\cos 2\theta)^{\|\mathbf{i}\|_1 - \|\mathbf{j}\|_1 - h} (\sin 2\theta)^{\|\mathbf{j}\|_1} \text{Tr} \left[ O_{\mathbf{i}}^{\mathbf{j}} \rho \right] \\
&\quad \cdot \sum_{\mathbf{i}'=\mathbf{1}_h}^{\mathbf{2}_h} (\cos 2\theta)^{\|\mathbf{i}'\|_1 - h} \text{Tr} \left[ O_{\mathbf{i}'}^{\mathbf{0}_h} \rho \right] \tag{44}
\end{aligned}$$

$$\begin{aligned}
&\geq - \mathbb{E}_{\theta \sim \mathcal{N}(0, \gamma^2)} \sum_{\mathbf{j} > \mathbf{0}_{h,2} \mid \|\mathbf{j}\|_1}^{\mathbf{1}_h} (\sin 2\theta)^{\|\mathbf{j}\|_1} \left( \left| \sum_{\mathbf{i}=\mathbf{j}+\mathbf{1}_h}^{\mathbf{2}_h} \left[ 1 - (\cos 2\theta)^{\|\mathbf{i}\|_1 - \|\mathbf{j}\|_1 - h} \right] \text{Tr} \left[ O_{\mathbf{i}}^{\mathbf{j}} \rho \right] \right| \right. \\
&\quad \left. + \left| \sum_{\mathbf{i}=\mathbf{j}+\mathbf{1}_h}^{\mathbf{2}_h} \text{Tr} \left[ O_{\mathbf{i}}^{\mathbf{j}} \rho \right] \right| \right) \cdot \left( \left| \sum_{\mathbf{i}'=\mathbf{1}_h}^{\mathbf{2}_h} \left[ 1 - (\cos 2\theta)^{\|\mathbf{i}'\|_1 - h} \right] \text{Tr} \left[ O_{\mathbf{i}'}^{\mathbf{0}_h} \rho \right] \right| + \left| \sum_{\mathbf{i}'=\mathbf{1}_h}^{\mathbf{2}_h} \text{Tr} \left[ O_{\mathbf{i}'}^{\mathbf{0}_h} \rho \right] \right| \right) \tag{45}
\end{aligned}$$

$$\geq - \mathbb{E}_{\theta \sim \mathcal{N}(0, \gamma^2)} \sum_{\mathbf{j} > \mathbf{0}_{h,2} \mid \|\mathbf{j}\|_1}^{\mathbf{1}_h} (\sin 2\theta)^{\|\mathbf{j}\|_1} \left( \left[ (2 - \cos 2\theta)^{h - \|\mathbf{j}\|_1} - 1 \right] \|\mathbf{c}\|_1 \|O_{\mathbf{0}_h}^{\mathbf{0}_h}\|_2 + \left| \text{Tr} \left[ O_{\mathbf{2}_h}^{\mathbf{j}} \rho \right] \right| \right)$$

$$\cdot \left( [(2 - \cos 2\theta)^h - 1] \|\mathbf{c}\|_1 \|O_{\mathbf{0}^h}^{\mathbf{0}^h}\|_2 + |\text{Tr}[O_{\mathbf{0}^h}^{\mathbf{0}^h} \rho]| \right) \quad (46)$$

$$\geq - \mathbb{E}_{\theta \sim \mathcal{N}(0, \gamma^2)} \sum_{\mathbf{j} > \mathbf{0}_h, 2\|\mathbf{j}\|_1}^{1_h} (\sin 2\theta)^{\|\mathbf{j}\|_1} (2 - \cos 2\theta)^{2h - \|\mathbf{j}\|_1} \|\mathbf{c}\|_1^2 \|O\|_2^2 \quad (47)$$

$$\geq - \|\mathbf{c}\|_1^2 \|O\|_2^2 \mathbb{E}_{\theta \sim \mathcal{N}(0, \gamma^2)} \sum_{\mathbf{j} > \mathbf{0}_h, 2\|\mathbf{j}\|_1}^{1_h} (2\theta)^{\|\mathbf{j}\|_1} (1 + 2\theta^2)^{2h - \|\mathbf{j}\|_1}. \quad (48)$$

Eq. (44) is obtained by noticing that the expectation of  $\sin^a 2\theta \cos^b 2\theta$  equals to zero, if  $a$  is odd. InEq. (45) is obtained by using  $\sum_{i,j} a_i b_j \geq -(\sum_i |a_i|)(\sum_j |b_j|)$  and  $|a + b| \leq |a| + |b|$ . InEq. (46) is derived by using the  $h' = h$  case of Eq. (32) and Eq. (15). InEq. (47) is obtained by using  $\|O_{\mathbf{0}^h}^{\mathbf{0}^h}\| = \|O\|$  and Eq. (31). InEq. (48) is derived by using  $(\sin 2\theta)^2 \leq (2\theta)^2$  and  $\cos 2\theta \geq 1 - 2\theta^2$ . We proceed from InEq. (48), which could be further bounded by

$$= - \|\mathbf{c}\|_1^2 \|O\|_2^2 \mathbb{E}_{\theta \sim \mathcal{N}(0, \gamma^2)} \sum_{t=1}^{\lfloor h/2 \rfloor} \binom{h}{2t} (2\theta)^{2t} \sum_{m=0}^{2h-2t} \binom{2h-2t}{m} (2\theta^2)^m \quad (49)$$

$$= - \|\mathbf{c}\|_1^2 \|O\|_2^2 \sum_{t=1}^{\lfloor h/2 \rfloor} \binom{h}{2t} \sum_{m=0}^{2h-2t} \binom{2h-2t}{m} 2^{2t+m} (2t+2m-1)!! \gamma^{2t+2m} \quad (50)$$

$$\geq - \|\mathbf{c}\|_1^2 \|O\|_2^2 \sum_{t=1}^{\lfloor h/2 \rfloor} \sum_{m=0}^{2h-2t} \frac{h(h-1)^{2t-1}}{2^t t! (2t-1)!!} \frac{(2h-2)^m}{m!} 2^{2t+m} \cdot (2t-1)!! (2t+1)(2t+3) \cdots (2t+2m-1) \gamma^{2t+2m} \quad (51)$$

$$\geq - \|\mathbf{c}\|_1^2 \|O\|_2^2 \sum_{t=1}^{\lfloor h/2 \rfloor} \sum_{m=0}^{2h-2t} \frac{h(h-1)^{2t-1}}{2^t 2^{t-1}} \frac{(2h-2)^m}{m!} 2^{2t+m} (2h)^m \gamma^{2t+2m} \quad (52)$$

$$\geq - \|\mathbf{c}\|_1^2 \|O\|_2^2 \sum_{t=1}^{\lfloor h/2 \rfloor} \left( 2h(h-1)^{2t-1} \gamma^{2t} + \sum_{m=1}^{2h-2t} 4h(h-1)^{2t-1} (2h-2)^m (2h)^m \gamma^{2t+2m} \right) \quad (53)$$

$$= - \|\mathbf{c}\|_1^2 \|O\|_2^2 \left( \sum_{t=1}^{\lfloor h/2 \rfloor} 2h(h-1)^{2t-1} \gamma^{2t} \right) \cdot \left( 1 + 2 \sum_{m=1}^{2h-2t} [4h(h-1)\gamma^2]^m \right) \quad (54)$$

$$\geq - \|\mathbf{c}\|_1^2 \|O\|_2^2 3h(h-1)\gamma^2 (1 + 12h(h-1)\gamma^2) \quad (55)$$

$$\geq - (6h^2 - 9h + 3) \gamma^2 \|\mathbf{c}\|_1^2 \|O\|_2^2. \quad (56)$$

Here, Eq. (49) is obtained since the summation  $\sum_{\mathbf{j} > \mathbf{0}_h}^{1_h}$  contains  $\binom{h}{2t}$  terms such that  $\|\mathbf{j}\|_1 = 2t$ , for all  $t \in \{1, \dots, \lfloor \frac{h}{2} \rfloor\}$ . Eq. (50) is derived by calculating expectation terms. InEq. (51) is obtained by using

$$\binom{h}{2t} \leq \frac{h(h-1)^{2t-1}}{(2t)!} = \frac{h(h-1)^{2t-1}}{2^t t! (2t-1)!!} \text{ and } \binom{2h-2t}{m} \leq \frac{(2h-2t)^m}{m!}.$$

InEq. (52) is derived by using  $t! \geq 2^{t-1}$  and

$$(2t+2k-1)(2t+2m-2k+1) \leq (2t+m)^2 \leq (2h)^2, \forall k \in \{1, \dots, m-1\}.$$

InEq. (53) is obtained by splitting the summation  $\sum_m$  and using  $m! \geq 2^{m-1}, \forall m \geq 1$ . InEq. (55) is derived by calculating geometric sequences with the condition  $\gamma^2 \leq \frac{1}{12h^2}$ . InEq. (56) follows from the condition  $\gamma^2 \leq \frac{1}{12h^2}$ . Thus, we have proved Eq. (24).  $\square$

125

**Lemma B.4.** Let  $\rho$  be the density matrix of a quantum state. Let  $V_h = W_1 e^{-i\theta G_1} W_2 \cdots W_h e^{-i\theta G_h}$ , where  $\{G_n\}_{n=1}^h$  is a list of hermitian unitaries and  $\{W_n\}_{n=1}^h$  is a list of unitary matrices. Denote by  $O$  an arbitrary hermitian quantum observable. Then

$$\mathbb{E}_{\theta \sim \mathcal{N}(0, \gamma^2)} \left( \frac{\partial}{\partial \theta} \text{Tr}[OV_h \rho V_h^\dagger] \right)^2 \geq (1 - 4\gamma^2) \left( \frac{\partial}{\partial \theta} \text{Tr}[OV_h \rho V_h^\dagger] \Big|_{\theta=0} \right)^2$$

$$-96h^2(h-1)\gamma^2\|O\|_2^2 - 20h^2(h-1)(h-2)\gamma^2\|O\|_2^2, \quad (57)$$

129 where  $\|O\|_2$  denotes the spectral norm of  $O$  and the variance  $\gamma^2 \leq \frac{1}{16h^3}$ .

130 *Proof.* For convenience, we follow the notation  $O_i^j$  in Eq. (13). We can obtain the detailed formulation  
 131 of  $\frac{\partial}{\partial\theta}\text{Tr}\left[OV_h\rho V_h^\dagger\right]$  by using the  $h' = h$  case of Eq. (16),

$$\frac{\partial}{\partial\theta}\text{Tr}\left[OV_h\rho V_h^\dagger\right] = \frac{\partial}{\partial\theta} \sum_{\mathbf{j}=\mathbf{0}_h}^{\mathbf{1}_h} \sum_{\mathbf{i}=\mathbf{j}+\mathbf{1}_h}^{\mathbf{2}_h} (\cos 2\theta)^{\|\mathbf{i}\|_1 - \|\mathbf{j}\|_1 - h} (\sin 2\theta)^{\|\mathbf{j}\|_1} \text{Tr}\left[O_i^j\rho\right] \quad (58)$$

$$\begin{aligned} &= 2 \sum_{\mathbf{j}=\mathbf{0}_h}^{\mathbf{1}_h} \sum_{\mathbf{i}=\mathbf{j}+\mathbf{1}_h}^{\mathbf{2}_h} (h + \|\mathbf{j}\|_1 - \|\mathbf{i}\|_1) (\cos 2\theta)^{\|\mathbf{i}\|_1 - \|\mathbf{j}\|_1 - h - 1} (\sin 2\theta)^{\|\mathbf{j}\|_1 + 1} \text{Tr}\left[O_i^j\rho\right] \\ &+ 2 \sum_{\mathbf{j}=\mathbf{0}_h}^{\mathbf{1}_h} \sum_{\mathbf{i}=\mathbf{j}+\mathbf{1}_h}^{\mathbf{2}_h} \|\mathbf{j}\|_1 (\cos 2\theta)^{\|\mathbf{i}\|_1 - \|\mathbf{j}\|_1 - h + 1} (\sin 2\theta)^{\|\mathbf{j}\|_1 - 1} \text{Tr}\left[O_i^j\rho\right] \end{aligned} \quad (59)$$

$$\begin{aligned} &= 2 \sum_{\mathbf{j}=\mathbf{0}_h}^{\mathbf{1}_h} \sum_{\mathbf{i}=\mathbf{j}+\mathbf{1}_h}^{\mathbf{2}_h} (h + \|\mathbf{j}\|_1 - \|\mathbf{i}\|_1) (\cos 2\theta)^{\|\mathbf{i}\|_1 - \|\mathbf{j}\|_1 - h - 1} (\sin 2\theta)^{\|\mathbf{j}\|_1 + 1} \text{Tr}\left[O_i^j\rho\right] \\ &+ 2 \sum_{\|\mathbf{j}\|_1=1} \sum_{\mathbf{i}=\mathbf{j}+\mathbf{1}_h}^{\mathbf{2}_h} (\cos 2\theta)^{\|\mathbf{i}\|_1 - h} \text{Tr}\left[O_i^j\rho\right] \\ &+ 2 \sum_{\|\mathbf{j}\|_1 \geq 2} \sum_{\mathbf{i}=\mathbf{j}+\mathbf{1}_h}^{\mathbf{2}_h} \|\mathbf{j}\|_1 (\cos 2\theta)^{\|\mathbf{i}\|_1 - \|\mathbf{j}\|_1 - h + 1} (\sin 2\theta)^{\|\mathbf{j}\|_1 - 1} \text{Tr}\left[O_i^j\rho\right]. \end{aligned} \quad (60)$$

132 Here, Eq. (58) follows from Eq. (16). Eq. (59) is derived by calculating the gradient of sine and  
 133 cosine terms. By discarding the square of the sum of the first and the third term in Eq. (60), we obtain

$$\begin{aligned} &\left(\frac{\partial}{\partial\theta}\text{Tr}\left[OV_h\rho V_h^\dagger\right]\right)^2 \geq 4 \left(\sum_{\|\mathbf{j}\|_1=1} \sum_{\mathbf{i}=\mathbf{j}+\mathbf{1}_h}^{\mathbf{2}_h} (\cos 2\theta)^{\|\mathbf{i}\|_1 - h} \text{Tr}\left[O_i^j\rho\right]\right)^2 \\ &+ 8 \left(\sum_{\|\mathbf{j}\|_1 \geq 2} \sum_{\mathbf{i}=\mathbf{j}+\mathbf{1}_h}^{\mathbf{2}_h} \|\mathbf{j}\|_1 (\cos 2\theta)^{\|\mathbf{i}\|_1 - \|\mathbf{j}\|_1 - h + 1} (\sin 2\theta)^{\|\mathbf{j}\|_1 - 1} \text{Tr}\left[O_i^j\rho\right]\right) \\ &\cdot \left(\sum_{\|\mathbf{j}'\|_1=1} \sum_{\mathbf{i}'=\mathbf{j}'+\mathbf{1}_h}^{\mathbf{2}_h} (\cos 2\theta)^{\|\mathbf{i}'\|_1 - h} \text{Tr}\left[O_{i'}^{j'}\rho\right]\right) \\ &+ 8 \left(\sum_{\mathbf{j}=\mathbf{0}_h}^{\mathbf{1}_h} \sum_{\mathbf{i}=\mathbf{j}+\mathbf{1}_h}^{\mathbf{2}_h} (h + \|\mathbf{j}\|_1 - \|\mathbf{i}\|_1) (\cos 2\theta)^{\|\mathbf{i}\|_1 - \|\mathbf{j}\|_1 - h - 1} (\sin 2\theta)^{\|\mathbf{j}\|_1 + 1} \text{Tr}\left[O_i^j\rho\right]\right) \\ &\cdot \left(\sum_{\|\mathbf{j}'\|_1=1} \sum_{\mathbf{i}'=\mathbf{j}'+\mathbf{1}_h}^{\mathbf{2}_h} (\cos 2\theta)^{\|\mathbf{i}'\|_1 - h} \text{Tr}\left[O_{i'}^{j'}\rho\right]\right). \end{aligned} \quad (61)$$

134 Let  $\theta = 0$  in Eq. (60), we obtain

$$\frac{\partial}{\partial\theta}\text{Tr}\left[OV_h\rho V_h^\dagger\right]\Big|_{\theta=0} = 2 \sum_{\|\mathbf{j}\|_1=1} \sum_{\mathbf{i}=\mathbf{j}+\mathbf{1}_h}^{\mathbf{2}_h} \text{Tr}\left[O_i^j\rho\right]. \quad (62)$$

135 Thus, we could obtain Eq. (57) if Eqs. (63-65) hold.

$$\mathbb{E}_{\theta \sim \mathcal{N}(0, \gamma^2)} \left( \sum_{\|\mathbf{j}\|_1=1} \sum_{\mathbf{i}=\mathbf{j}+\mathbf{1}_h}^{\mathbf{2}_h} (\cos 2\theta)^{\|\mathbf{i}\|_1 - h} \text{Tr}\left[O_i^j\rho\right] \right)^2 - (1 - 4\gamma^2) \left( \sum_{\|\mathbf{j}\|_1=1} \sum_{\mathbf{i}=\mathbf{j}+\mathbf{1}_h}^{\mathbf{2}_h} \text{Tr}\left[O_i^j\rho\right] \right)^2$$

$$\geq -\frac{13}{3}h^2(h-1)\gamma^2\|O\|_2^2, \quad (63)$$

$$\begin{aligned} & \mathbb{E}_{\theta \sim \mathcal{N}(0, \gamma^2)} \left( \sum_{j=0_h}^{1_h} \sum_{i=j+1_h}^{2_h} (h + \|j\|_1 - \|i\|_1) (\cos 2\theta)^{\|i\|_1 - \|j\|_1 - h - 1} (\sin 2\theta)^{\|j\|_1 + 1} \text{Tr} [O_i^j \rho] \right) \\ & \cdot \left( \sum_{\|j'\|_1=1} \sum_{i'=j'+1_h}^{2_h} (\cos 2\theta)^{\|i'\|_1 - h} \text{Tr} [O_{i'}^{j'} \rho] \right) \geq -\frac{59}{6}h^2(h-1)\gamma^2\|O\|_2^2, \end{aligned} \quad (64)$$

$$\begin{aligned} & \mathbb{E}_{\theta \sim \mathcal{N}(0, \gamma^2)} \left( \sum_{\|j\|_1 \geq 2} \sum_{i=j+1_h}^{2_h} \|j\|_1 (\cos 2\theta)^{\|i\|_1 - \|j\|_1 - h + 1} (\sin 2\theta)^{\|j\|_1 - 1} \text{Tr} [O_i^j \rho] \right) \\ & \cdot \left( \sum_{\|j'\|_1=1} \sum_{i'=j'+1_h}^{2_h} (\cos 2\theta)^{\|i'\|_1 - h} \text{Tr} [O_{i'}^{j'} \rho] \right) \geq -\frac{5}{2}h^2(h-1)(h-2)\gamma^2\|O\|_2^2. \end{aligned} \quad (65)$$

136 We begin by proving Eq. (63). The left side of Eq. (63) can be lower bounded as

$$\begin{aligned} & \geq \mathbb{E}_{\theta \sim \mathcal{N}(0, \gamma^2)} \left( \sum_{\|j\|_1=1} \sum_{i=j+1_h}^{2_h} [\cos 2\theta - (\cos 2\theta)^{\|i\|_1 - h} - \cos 2\theta] \text{Tr} [O_i^j \rho] \right)^2 \\ & - \left( \cos 2\theta \sum_{\|j\|_1=1} \sum_{i=j+1_h}^{2_h} \text{Tr} [O_i^j \rho] \right)^2 \end{aligned} \quad (66)$$

$$\begin{aligned} & \geq -2 \mathbb{E}_{\theta \sim \mathcal{N}(0, \gamma^2)} (\cos 2\theta)^2 \sum_{\|j\|_1=1} \left| \sum_{i=j+1_h}^{2_h} [1 - (\cos 2\theta)^{\|i\|_1 - 1 - h}] \text{Tr} [O_i^j \rho] \right| \\ & \cdot \sum_{\|j'\|_1=1} \left| \sum_{i'=j'+1_h}^{2_h} \text{Tr} [O_{i'}^{j'} \rho] \right| \end{aligned} \quad (67)$$

$$\geq -2 \mathbb{E}_{\theta \sim \mathcal{N}(0, \gamma^2)} (\cos 2\theta)^2 \sum_{\|j\|_1=1} [(2 - \cos 2\theta)^{h-1} - 1] \|O\|_2 \cdot \sum_{\|j'\|_1=1} \left| \sum_{i=j'+1_h}^{2_h} \text{Tr} [O_i^{j'} \rho] \right| \quad (68)$$

$$\geq -2 \mathbb{E}_{\theta \sim \mathcal{N}(0, \gamma^2)} (\cos 2\theta)^2 h [(2 - \cos 2\theta)^{h-1} - 1] \|O\|_2 \cdot h \|O\|_2 \quad (69)$$

$$\geq -2h^2\|O\|_2^2 \mathbb{E}_{\theta \sim \mathcal{N}(0, \gamma^2)} [(1 + 2\theta^2)^{h-1} - 1] \quad (70)$$

$$\geq -\frac{13}{3}h^2(h-1)\gamma^2\|O\|_2^2. \quad (71)$$

Here, InEq. (66) follows from

$$1 - 4\gamma^2 = \mathbb{E}_\theta[1 - 4\theta^2] \leq \mathbb{E}_\theta(1 - 2\theta^2)^2 \leq \mathbb{E}_\theta(\cos 2\theta)^2.$$

137 InEq. (67) is obtained by using  $(a-b)^2 - b^2 \geq -2|a| \cdot |b|$ . InEq. (68) follows from the  $h' = h$  and  
 138  $\|j\| = 1$  case of Eq. (32). InEq. (69) is derived by using Eq. (15). InEq. (70) is obtained by using  
 139  $\cos 2\theta \geq 1 - 2\theta^2$ . InEq. (71) follows from the derivation below.

$$\begin{aligned} \mathbb{E}_{\theta \sim \mathcal{N}(0, \gamma^2)} (1 + 2\theta^2)^{h-1} - 1 &= \mathbb{E}_{\theta \sim \mathcal{N}(0, \gamma^2)} \sum_{t=1}^{h-1} \binom{h-1}{t} (2\theta^2)^t \\ &= \sum_{t=1}^{h-1} \binom{h-1}{t} (2t-1)!! (2\gamma^2)^t \\ &\leq \sum_{t=1}^{h-1} (h-1)(h-2)^{t-1} 2^{t-1} (2\gamma^2)^t \end{aligned} \quad (72)$$

$$\leq 2(h-1)\gamma^2 \sum_{t=1}^{h-1} [h^3\gamma^2]^{t-1} \quad (73)$$

$$\leq \frac{13}{6}(h-1)\gamma^2, \quad (74)$$

where Eq. (72) is obtained by calculating expectation terms. InEq (73) follows from  $h^3 \geq 4(h-2)$  for integer  $h$ . InEq. (74) is derived by calculating geometric sequences with the condition  $\gamma^2 \leq \frac{1}{16h^3}$ .

Next, we prove Eq. (64). The left side of Eq. (64) could be lower bounded by

$$\begin{aligned} &= \mathbb{E}_{\theta \sim \mathcal{N}(0, \gamma^2)} \left( \sum_{\|\mathbf{j}'\|_1=1} \sum_{\mathbf{i}'=\mathbf{j}'+\mathbf{1}_h}^{2_h} (\cos 2\theta)^{\|\mathbf{i}'\|_1-1-h} \text{Tr} [O_{\mathbf{i}'}^{j'} \rho] \right) \\ &\quad \cdot \left( \sum_{\substack{\mathbf{j}=\mathbf{0}_h \\ 2|(\|\mathbf{j}\|_1+1)}}^{1_h} \sum_{\mathbf{i}=\mathbf{j}+\mathbf{1}_h}^{2_h} (h + \|\mathbf{j}\|_1 - \|\mathbf{i}\|_1) (\cos 2\theta)^{\|\mathbf{i}\|_1-\|\mathbf{j}\|_1-h} (\sin 2\theta)^{\|\mathbf{j}\|_1+1} \text{Tr} [O_{\mathbf{i}}^j \rho] \right) \end{aligned} \quad (75)$$

$$\begin{aligned} &\geq - \mathbb{E}_{\theta \sim \mathcal{N}(0, \gamma^2)} \sum_{\|\mathbf{j}'\|_1=1} \left( \left| \sum_{\mathbf{i}'=\mathbf{j}'+\mathbf{1}_h}^{2_h} [1 - (\cos 2\theta)^{\|\mathbf{i}'\|_1-1-h}] \text{Tr} [O_{\mathbf{i}'}^{j'} \rho] \right| + \left| \sum_{\mathbf{i}'=\mathbf{j}'+\mathbf{1}_h}^{2_h} \text{Tr} [O_{\mathbf{i}'}^{j'} \rho] \right| \right) \\ &\quad \cdot \sum_{\substack{\mathbf{j}=\mathbf{0}_h \\ 2|(\|\mathbf{j}\|_1+1)}}^{1_h} (\sin 2\theta)^{\|\mathbf{j}\|_1+1} \left| \sum_{\mathbf{i}=\mathbf{j}+\mathbf{1}_h}^{2_h} ((\|\mathbf{i}\|_1 - \|\mathbf{j}\|_1 - h) (\cos 2\theta)^{\|\mathbf{i}\|_1-\|\mathbf{j}\|_1-h} \text{Tr} [O_{\mathbf{i}}^j \rho]) \right| \end{aligned} \quad (76)$$

$$\begin{aligned} &\geq - \mathbb{E}_{\theta \sim \mathcal{N}(0, \gamma^2)} \sum_{\|\mathbf{j}'\|_1=1} (2 - \cos 2\theta)^{h-1} \|O\|_2 \sum_{\substack{\mathbf{j}=\mathbf{0}_h \\ 2|(\|\mathbf{j}\|_1+1)}}^{1_h} (\sin 2\theta)^{\|\mathbf{j}\|_1+1} \\ &\quad \left| \sum_{\mathbf{i}=\mathbf{j}+\mathbf{1}_h}^{2_h} \left[ (h - \|\mathbf{j}\|_1) - (\|\mathbf{i}\|_1 - \|\mathbf{j}\|_1 - h) (\cos 2\theta)^{\|\mathbf{i}\|_1-\|\mathbf{j}\|_1-h} - (h - \|\mathbf{j}\|_1) \right] \text{Tr} [O_{\mathbf{i}}^j \rho] \right| \end{aligned} \quad (77)$$

$$\begin{aligned} &\geq -h \|O\|_2^2 \mathbb{E}_{\theta \sim \mathcal{N}(0, \gamma^2)} (2 - \cos 2\theta)^{h-1} \\ &\quad \cdot \sum_{\substack{\mathbf{j}=\mathbf{0}_h \\ 2|(\|\mathbf{j}\|_1+1)}}^{1_h} (\sin 2\theta)^{\|\mathbf{j}\|_1+1} (h - \|\mathbf{j}\|_1) (3 - \cos 2\theta) (2 - \cos 2\theta)^{h-\|\mathbf{j}\|_1-1}. \end{aligned} \quad (78)$$

Here, Eq. (75) is obtained by noticing that the expectation of  $\sin^a 2\theta \cos^b 2\theta$  equals to zero, if  $a$  is odd. InEq. (76) is derived by using  $|\sum_k a_k| \leq \sum_k |a_k|$ . InEq. (77) is obtained by using the  $h' = h$ ,  $\|\mathbf{j}\|_1 = 1$  case of Eq. (32) and Eq. (15). InEq. (78) follows from Eq. (15) and the  $h' = h$  case of Eq. (79), i.e.

$$\begin{aligned} &\left| \sum_{\mathbf{i}'=\mathbf{j}'+\mathbf{1}_{h'}}^{2_{h'}} \left[ (h' - \|\mathbf{j}'\|_1) - (\|\mathbf{i}'\|_1 - \|\mathbf{j}'\|_1 - h') (\cos 2\theta)^{\|\mathbf{i}'\|_1-\|\mathbf{j}'\|_1-h'} \right] \text{Tr} [O_{\mathbf{i}'}^{j',j} \rho] \right| \\ &\leq g(h' - \|\mathbf{j}'\|_1) \|O\|_2 \end{aligned} \quad (79)$$

for all  $h' \in \{0, 1, \dots, h\}$ ,  $\mathbf{i} \in \{0, 1, 2\}^{h-h'}$ , and  $\mathbf{j} \in \{0, 1\}^{h-h'}$ , where

$$g(x) = x [(3 - \cos 2\theta)(2 - \cos 2\theta)^{x-1} - 1]. \quad (80)$$

InEq. (79) can be proved inductively. First, InEq. (79) holds trivially when  $h' = 0$ . Next, we assume that InEq. (79) holds for the  $h' = k$  case. Then, for all  $\mathbf{i} \in \{0, 1, 2\}^{h-k-1}$  and  $\mathbf{j} \in \{0, 1\}^{h-k-1}$ , we

150 have

$$\begin{aligned}
& \left| \sum_{\mathbf{i}'=\mathbf{j}'+\mathbf{1}_{k+1}}^{\mathbf{2}_{k+1}} \left[ (k+1 - \|\mathbf{j}'\|_1) - (\|\mathbf{i}'\|_1 - \|\mathbf{j}'\|_1 - k - 1)(\cos 2\theta)^{\|\mathbf{i}'\|_1 - \|\mathbf{j}'\|_1 - k - 1} \right] \text{Tr} \left[ O_{\mathbf{i}', \mathbf{i}}^{\mathbf{j}', \mathbf{j}} \rho \right] \right| \\
&= \left| \sum_{\mathbf{i}'_{k+1}=\mathbf{j}'_{k+1}+1}^2 \sum_{\mathbf{i}'=\mathbf{j}'+\mathbf{1}_k}^{\mathbf{2}_k} \left[ (k+1 - \|\mathbf{j}'\|_1 - j'_{k+1}) \right. \right. \\
&\quad \left. \left. - (\|\mathbf{i}'\|_1 + i'_{k+1} - \|\mathbf{j}'\|_1 - j'_{k+1} - k - 1)(\cos 2\theta)^{\|\mathbf{i}'\|_1 + i'_{k+1} - \|\mathbf{j}'\|_1 - j'_{k+1} - k - 1} \right] \text{Tr} \left[ O_{\mathbf{i}', i'_{k+1}, \mathbf{i}}^{\mathbf{j}', j'_{k+1}, \mathbf{j}} \rho \right] \right|. \tag{81}
\end{aligned}$$

151 For the case  $j'_{k+1} = 1$ , we have

$$\begin{aligned}
\text{Eq. (81)} &= \left| \sum_{\mathbf{i}'=\mathbf{j}'+\mathbf{1}_k}^{\mathbf{2}_k} \left[ (k - \|\mathbf{j}'\|_1) - (\|\mathbf{i}'\|_1 - \|\mathbf{j}'\|_1 - k)(\cos 2\theta)^{\|\mathbf{i}'\|_1 - \|\mathbf{j}'\|_1 - k} \right] \text{Tr} \left[ O_{\mathbf{i}', 2, \mathbf{i}}^{\mathbf{j}', 1, \mathbf{j}} \rho \right] \right| \\
&\leq g(k - \|\mathbf{j}'\|_1) \|O\|_2 \tag{82} \\
&= g(k+1 - \|\mathbf{j}'\|_1 - j'_{k+1}) \|O\|_2. \tag{83}
\end{aligned}$$

152 Here, Eq. (82) follows from the  $h' = k$  case of InEq. (79). Eq. (83) is obtained by using  $j'_{k+1} = 1$ .

153 We remark that InEq. (83) matches the  $h' = k+1$  case of InEq. (79).

154 For the case  $j'_{k+1} = 0$ , the situation is more complicated. We have

$$\begin{aligned}
& \text{Eq. (81)} \\
&= \left| \sum_{\mathbf{i}'=\mathbf{j}'+\mathbf{1}_k}^{\mathbf{2}_k} \left[ (k+1 - \|\mathbf{j}'\|_1) - (\|\mathbf{i}'\|_1 - \|\mathbf{j}'\|_1 - k)(\cos 2\theta)^{\|\mathbf{i}'\|_1 - \|\mathbf{j}'\|_1 - k} \right] \text{Tr} \left[ O_{\mathbf{i}', 1, \mathbf{i}}^{\mathbf{j}', 0, \mathbf{j}} \rho \right] \right. \\
&\quad \left. + \sum_{\mathbf{i}'=\mathbf{j}'+\mathbf{1}_k}^{\mathbf{2}_k} \left[ (k+1 - \|\mathbf{j}'\|_1) - (\|\mathbf{i}'\|_1 - \|\mathbf{j}'\|_1 - k+1)(\cos 2\theta)^{\|\mathbf{i}'\|_1 - \|\mathbf{j}'\|_1 - k+1} \right] \text{Tr} \left[ O_{\mathbf{i}', 2, \mathbf{i}}^{\mathbf{j}', 0, \mathbf{j}} \rho \right] \right| \\
&\leq \left| \sum_{\mathbf{i}'=\mathbf{j}'+\mathbf{1}_k}^{\mathbf{2}_k} \text{Tr} \left[ O_{\mathbf{i}', 1, \mathbf{i}}^{\mathbf{j}', 0, \mathbf{j}} \rho \right] \right. \\
&\quad + \sum_{\mathbf{i}'=\mathbf{j}'+\mathbf{1}_k}^{\mathbf{2}_k} \left[ (k - \|\mathbf{j}'\|_1) - (\|\mathbf{i}'\|_1 - \|\mathbf{j}'\|_1 - k)(\cos 2\theta)^{\|\mathbf{i}'\|_1 - \|\mathbf{j}'\|_1 - k} \right] \text{Tr} \left[ O_{\mathbf{i}', 0, \mathbf{i}}^{\mathbf{j}', 0, \mathbf{j}} \rho \right] \\
&\quad + (1 - \cos 2\theta)(k+1 - \|\mathbf{j}'\|_1) \sum_{\mathbf{i}'=\mathbf{j}'+\mathbf{1}_k}^{\mathbf{2}_k} \text{Tr} \left[ O_{\mathbf{i}', 2, \mathbf{i}}^{\mathbf{j}', 0, \mathbf{j}} \rho \right] \\
&\quad + \cos 2\theta \sum_{\mathbf{i}'=\mathbf{j}'+\mathbf{1}_k}^{\mathbf{2}_k} \left[ 1 - (\cos 2\theta)^{\|\mathbf{i}'\|_1 - \|\mathbf{j}'\|_1 - k} \right] \text{Tr} \left[ O_{\mathbf{i}', 2, \mathbf{i}}^{\mathbf{j}', 0, \mathbf{j}} \rho \right] \\
&\quad \left. - (1 - \cos 2\theta) \sum_{\mathbf{i}'=\mathbf{j}'+\mathbf{1}_k}^{\mathbf{2}_k} \left[ (k - \|\mathbf{j}'\|_1) - (\|\mathbf{i}'\|_1 - \|\mathbf{j}'\|_1 - k)(\cos 2\theta)^{\|\mathbf{i}'\|_1 - \|\mathbf{j}'\|_1 - k} \right] \text{Tr} \left[ O_{\mathbf{i}', 2, \mathbf{i}}^{\mathbf{j}', 0, \mathbf{j}} \rho \right] \right| \\
&\leq \left\| O_{\mathbf{0}_k, 1, \mathbf{i}}^{\mathbf{0}_k, 0, \mathbf{j}} \right\|_2 + g(k - \|\mathbf{j}'\|_1) \|O\|_2 + (1 - \cos 2\theta)(k+1 - \|\mathbf{j}'\|_1) \left\| O_{\mathbf{0}_k, 2, \mathbf{i}}^{\mathbf{0}_k, 0, \mathbf{j}} \right\|_2 \\
&\quad + |\cos 2\theta| \left[ (2 - \cos 2\theta)^{k - \|\mathbf{j}'\|_1} - 1 \right] \left\| O_{\mathbf{0}_k, 2, \mathbf{i}}^{\mathbf{0}_k, 0, \mathbf{j}} \right\|_2 + (1 - \cos 2\theta)g(k - \|\mathbf{j}'\|_1) \|O\|_2 \tag{84} \\
&\leq \left[ (2 - \cos 2\theta)(k - \|\mathbf{j}'\|_1) \left[ (3 - \cos 2\theta)(2 - \cos 2\theta)^{k - \|\mathbf{j}'\|_1 - 1} - 1 \right] \right. \\
&\quad \left. + (2 - \cos 2\theta)^{k - \|\mathbf{j}'\|_1} + (1 - \cos 2\theta)(k+1 - \|\mathbf{j}'\|_1) \right] \|O\|_2 \tag{85}
\end{aligned}$$

$$\leq g(k+1 - \|\mathbf{j}'\| - j'_{k+1}) \|O\|_2. \quad (86)$$

Here, InEq. (84) is obtained by using the  $h' = k$  case of Eq. (79). InEq. (85) is obtained by using Eqs. (14) and (80). InEq. (86) follows from Eq. (80) and the condition  $j'_{k+1} = 0$ . Since Eqs. (83) and (86) match the formulation of the  $h' = k+1$  case of Eq. (79), we have proved Eq. (79) for general cases.

We proceed from Eq. (78), which can be lower bounded by

$$\geq -h(h-1)\|O\|_2^2 \mathbb{E}_{\theta \sim \mathcal{N}(0, \gamma^2)} \sum_{\substack{\mathbf{j}=0_h \\ 2\lceil \|\mathbf{j}\|_1+1 \rceil}}^{\mathbf{1}_h} (2\theta)^{\|\mathbf{j}\|_1+1} 2(1+2\theta^2)^{2h-1-\|\mathbf{j}\|_1} \quad (87)$$

$$\geq -2h(h-1)\|O\|_2^2 \mathbb{E}_{\theta \sim \mathcal{N}(0, \gamma^2)} \sum_{t=1}^{\lfloor \frac{h+1}{2} \rfloor} \binom{h}{2t-1} (2\theta)^{2t} \sum_{m=0}^{2h-2t} \binom{2h-2t}{m} (2\theta^2)^m \quad (88)$$

$$= -2h(h-1)\|O\|_2^2 \sum_{t=1}^{\lfloor \frac{h+1}{2} \rfloor} \binom{h}{2t-1} \sum_{m=0}^{2h-2t} \binom{2h-2t}{m} 2^{2t+m} (2t+2m-1)!! \gamma^{2t+2m} \quad (89)$$

$$\geq -\frac{59}{6} h^2 (h-1) \gamma^2 \|O\|_2^2. \quad (90)$$

Here, InEq. (87) is obtained by using  $1 \geq \cos 2\theta \geq 1 - 2\theta^2$ . InEq. (88) is obtained since the summation  $\sum_{\mathbf{j}=0_h}^{\mathbf{1}_h}$  contains  $\binom{h}{2t-1}$  terms such that  $\|\mathbf{j}\|_1 = 2t-1$ , for all  $t \in \{1, \dots, \lfloor \frac{h+1}{2} \rfloor\}$ . Eq. (89) is derived by calculating expectation terms. InEq. (90) is obtained by bounding the summation terms, i.e.

$$\begin{aligned} & \sum_{t=1}^{\lfloor \frac{h+1}{2} \rfloor} \binom{h}{2t-1} \sum_{m=0}^{2h-2t} \binom{2h-2t}{m} 2^{2t+m} (2t+2m-1)!! \gamma^{2t+2m} \\ & \leq \sum_{t=1}^{\lfloor \frac{h+1}{2} \rfloor} \frac{h(h-1)^{2t-2}}{2^{t-1}(t-1)!(2t-1)!!} \sum_{m=0}^{2h-2t} \frac{(2h-2t)^m}{m!} 2^{2t+m} \\ & \quad \cdot (2t-1)!!(2t+1)(2t+3) \cdots (2t+2m-1) \gamma^{2t+2m} \end{aligned} \quad (91)$$

$$\leq \sum_{t=1}^{\lfloor \frac{h+1}{2} \rfloor} h(h-1)^{2t-2} 2^{t+1} \gamma^{2t} \sum_{m=0}^{2h-2t} (2h-2)^m 2^m (2h)^m \gamma^{2m} \quad (92)$$

$$\leq 4h\gamma^2 \sum_{t=1}^{\lfloor \frac{h+1}{2} \rfloor} [h(h-1)^2 \gamma^2]^{t-1} \sum_{m=0}^{2h-2t} (2h^3 \gamma^2)^m \quad (93)$$

$$\leq 4h\gamma^2 \frac{16}{15} \times \frac{8}{7} \leq \frac{59}{12} h\gamma^2. \quad (94)$$

Here, InEq. (91) follows from  $t \geq 1$  and  $(2t-1)! = 2^t t! (2t-1)!!$ . InEq. (92) is obtained by using  $t \geq 1$  and

$$(2t+2k-1)(2t+2m-2k+1) \leq (m+2t)^2 \leq (2h)^2, \quad \forall k \in \{1, \dots, m\}.$$

InEq. (93) is derived by using  $8h(h-1) \leq 2h^3$  for the integer  $h$ . InEq. (94) is obtained by calculating geometric sequences with the condition  $\gamma^2 \leq \frac{1}{16h^3}$ .

Finally, we prove Eq. (65). The left side of Eq. (65) could be lower bounded by

$$\begin{aligned} & = \mathbb{E}_{\theta \sim \mathcal{N}(0, \gamma^2)} \left( \sum_{\|\mathbf{j}'\|_1=1} \sum_{\mathbf{i}'=\mathbf{j}'+\mathbf{1}_h}^{2_h} (\cos 2\theta)^{\|\mathbf{i}'\|_1-h-1} \text{Tr} [O_{\mathbf{i}'}^{j'} \rho] \right) \\ & \quad \cdot \left( \sum_{\substack{\mathbf{j}=0_h \\ \|\mathbf{j}\|_1 \geq 2, 2\lceil \|\mathbf{j}\|_1-1 \rceil}}^{\mathbf{1}_h} \sum_{\mathbf{i}=\mathbf{j}+\mathbf{1}_h}^{2_h} \|\mathbf{j}\|_1 (\cos 2\theta)^{\|\mathbf{i}\|_1-\|\mathbf{j}\|_1-h+2} (\sin 2\theta)^{\|\mathbf{j}\|_1-1} \text{Tr} [O_{\mathbf{i}}^j \rho] \right) \end{aligned} \quad (95)$$

$$\geq - \mathbb{E}_{\theta \sim \mathcal{N}(0, \gamma^2)} \sum_{\|\mathbf{j}'\|_1=1} (2 - \cos 2\theta)^{h-1} \|O\|_2 \sum_{\substack{\mathbf{j}=\mathbf{0}_h \\ \|\mathbf{j}\|_1 \geq 2, 2\lfloor \|\mathbf{j}\|_1 - 1 \rfloor}}^{\mathbf{1}_h} \|\mathbf{j}\|_1 (\sin 2\theta)^{\|\mathbf{j}\|_1-1} (\cos 2\theta)^2 \left\{ \left| \sum_{i=\mathbf{j}+\mathbf{1}_h}^{2_h} \left[ 1 - (\cos 2\theta)^{\|\mathbf{i}\|_1 - \|\mathbf{j}\|_1 - h} \right] \text{Tr} [O_{\mathbf{i}}^{\mathbf{j}} \rho] \right| + \left| \sum_{i=\mathbf{j}+\mathbf{1}_h}^{2_h} \text{Tr} [O_{\mathbf{i}}^{\mathbf{j}} \rho] \right| \right\} \quad (96)$$

$$\geq - \mathbb{E}_{\theta \sim \mathcal{N}(0, \gamma^2)} h (2 - \cos 2\theta)^{h-1} \|O\|_2 \sum_{\substack{\mathbf{j}=\mathbf{0}_h \\ \|\mathbf{j}\|_1 \geq 2, 2\lfloor \|\mathbf{j}\|_1 - 1 \rfloor}}^{\mathbf{1}_h} \|\mathbf{j}\|_1 (\sin 2\theta)^{\|\mathbf{j}\|_1-1} (\cos 2\theta)^2 (2 - \cos 2\theta)^{h-\|\mathbf{j}\|_1} \|O\|_2 \quad (97)$$

$$\geq - \mathbb{E}_{\theta \sim \mathcal{N}(0, \gamma^2)} h \|O\|_2^2 \sum_{\substack{\mathbf{j}=\mathbf{0}_h \\ \|\mathbf{j}\|_1 \geq 2, 2\lfloor \|\mathbf{j}\|_1 - 1 \rfloor}}^{\mathbf{1}_h} \|\mathbf{j}\|_1 (2\theta)^{\|\mathbf{j}\|_1-1} (1 + 2\theta^2)^{2h-1-\|\mathbf{j}\|_1} \quad (98)$$

$$\geq - \mathbb{E}_{\theta \sim \mathcal{N}(0, \gamma^2)} h \|O\|_2^2 \sum_{t=1}^{\lfloor \frac{h-1}{2} \rfloor} \binom{h}{2t+1} (2t+1) (2\theta)^{2t} (1 + 2\theta^2)^{2h-2-2t}. \quad (99)$$

Eq. (95) is obtained by noticing that the expectation of  $\sin^a 2\theta \cos^b 2\theta$  equals to zero, if  $a$  is odd. InEq. (96) follows from the derivation (75-77). InEq. (97) is obtained by using the  $h' = h$ ,  $\|\mathbf{j}\|_1 = 1$  case of Eq. (32). InEq. (98) follows from  $1 \geq \cos 2\theta \geq 1 - 2\theta^2$  and  $(\sin 2\theta)^2 \leq (2\theta)^2$ . InEq. (99) is obtained since the summation  $\sum_{\mathbf{j}=\mathbf{0}_h}^{\mathbf{1}_h}$  contains  $\binom{h}{2t+1}$  terms such that  $\|\mathbf{j}\|_1 = 2t+1$ , for all  $t \in \{1, \dots, \lfloor \frac{h-1}{2} \rfloor\}$ . We further bound InEq. (99) by

$$= - \mathbb{E}_{\theta \sim \mathcal{N}(0, \gamma^2)} h \|O\|_2^2 \sum_{t=1}^{\lfloor \frac{h-1}{2} \rfloor} \binom{h}{2t+1} (2t+1) (2\theta)^{2t} \sum_{m=0}^{2h-2-2t} \binom{2h-2-2t}{m} (2\theta^2)^m \geq - h \|O\|_2^2 \sum_{t=1}^{\lfloor \frac{h-1}{2} \rfloor} \binom{h}{2t+1} (2t+1) \sum_{m=0}^{2h-2-2t} \binom{2h-2-2t}{m} 2^{2t+m} (2t+2m-1)!! \gamma^{2t+2m} \quad (100)$$

$$\geq - h \|O\|_2^2 \sum_{t=1}^{\lfloor \frac{h-1}{2} \rfloor} \frac{h(h-1)(h-2)(h-3)^{2t-2}}{(2t)!} 2^{2t} \gamma^{2t} \cdot \sum_{m=0}^{2h-2-2t} (2h-2-2t)^m 2^m (2t+2m-1)!! \gamma^{2m} \quad (101)$$

$$= - h^2 (h-1)(h-2) \|O\|_2^2 \sum_{t=1}^{\lfloor \frac{h-1}{2} \rfloor} \frac{(h-3)^{2t-2}}{2^t t! (2t-1)!!} 2^{2t} \gamma^{2t} \cdot \sum_{m=0}^{2h-2-2t} (2h-2-2t)^m 2^m (2t+2m-1)!! \gamma^{2m} \quad (102)$$

$$= - \frac{5}{2} h^2 (h-1)(h-2) \gamma^2 \|O\|_2^2. \quad (103)$$

Here, InEq. (100) is obtained by calculating expectation terms. InEq. (101) is derived by using  $t \geq 1$ . Eq. (102) follows from  $(2t)! = 2^t t! (2t-1)!!$ . Eq. (103) is obtained by bounding the summation terms, i.e.

$$\sum_{t=1}^{\lfloor \frac{h-1}{2} \rfloor} \frac{(h-3)^{2t-2}}{2^t t! (2t-1)!!} 2^{2t} \gamma^{2t} \sum_{m=0}^{2h-2-2t} (2h-2-2t)^m 2^m (2t+2m-1)!! \gamma^{2m}$$



$$\leq \sum_{t=1}^{\lfloor \frac{h-1}{2} \rfloor} \frac{(h-3)^{2t-2}}{2^{t-1}} 2^t \gamma^{2t} \sum_{m=0}^{2h-2-2t} (2h-4)^m 2^m (2h-2)^m \gamma^{2m} \quad (104)$$

$$\leq 2\gamma^2 \sum_{t=1}^{\lfloor \frac{h-1}{2} \rfloor} [(h-3)^2 \gamma^2]^{t-1} \sum_{m=0}^{2h-2-2t} (h^3 \gamma^2)^m \quad (105)$$

$$\leq 2\gamma^2 \left(\frac{16}{15}\right)^2 \leq \frac{5}{2} \gamma^2. \quad (106)$$

Here, InEq. (104) is obtained by using  $t! \geq 2^{t-1}, \forall t \geq 1$  and

$$(2t+2k-1)(2t+2m-2k+1) \leq (m+2t)^2 \leq (2h-2)^2, \forall k \in \{1, \dots, m\}.$$

175 InEq. (105) follows from  $h^3 \geq 8(h-1)(h-2)$  for integer  $h$ . InEq. (106) is obtained by calculating  
176 geometric sequences with the condition  $\gamma^2 \leq \frac{1}{16h^3}$ . Thus, we have proved Eq. (65).

177

□

## 178 C Proof of Theorem 4.1

179 *Proof.* Denote by  $I_S := \{m | i_m \neq 0, m \in [N]\}$  the set of qubits where the observable acts non-  
180 trivially. First, we notice that the norm of the whole gradient is lower bounded by that of particle  
181 derivatives summed over a part of parameters, i.e.

$$\mathbb{E}_{\theta} \|\nabla_{\theta} f\|^2 \geq \sum_{q=1}^L \sum_{n \in I_S} \mathbb{E}_{\theta} \left( \frac{\partial f}{\partial \theta_{q,n}} \right)^2. \quad (107)$$

182 Thus, we could obtain the formulation in the theorem if

$$\mathbb{E}_{\theta} \left( \frac{\partial f}{\partial \theta_{q,n}} \right)^2 \geq \frac{1}{S^{S+1}(L+2)^{S+1}} \text{Tr}[\sigma_j \rho_{\text{in}}]^2, \quad (108)$$

183 holds for any  $q \in \{1, \dots, L\}$  and  $n \in I_S$ .

184 Now we begin to prove Eq. (108). Our main idea is to integrate the square of the partial derivative of  
185  $f$  with respect to  $\theta = (\theta_1, \dots, \theta_{L+2})$  by using Lemma B.1 and Lemma B.2.

186 We introduce several notations for convenience. Denote the variance  $\gamma^2 = \frac{1}{4S(L+2)}$ . Denote the  $\ell$ -th  
187 single qubit rotations and CZ layer as  $R_{\ell}(\theta_{\ell})$  and  $\text{CZ}_{\ell}$ , respectively, where

$$R_{\ell}(\theta_{\ell}) = e^{-i\theta_{\ell,1}G_{\ell,1}} \otimes e^{-i\theta_{\ell,2}G_{\ell,2}} \otimes \dots \otimes e^{-i\theta_{\ell,N}G_{\ell,N}}, \quad (109)$$

188 and  $G_{\ell,j}$  is the Hamiltonian corresponding to the parameter  $\theta_{\ell,j}$ . Denote by  $\rho_k$  the state after the  $k$ -th  
189 layer,  $\forall k \in \{0, 1, \dots, 2L+2\}$ ,

$$\rho_k := \begin{cases} \left( \prod_{i=\frac{k}{2}}^1 \text{CZ}_i R_i(\theta_i) \right) \rho_{\text{in}} \left( \prod_{i=1}^{\frac{k}{2}} R_i(\theta_i)^{\dagger} \text{CZ}_i^{\dagger} \right) & (k = 2\ell \leq 2L), \\ R_{\frac{k+1}{2}}(\theta_{\frac{k+1}{2}}) \rho_{k-1} R_{\frac{k+1}{2}}(\theta_{\frac{k+1}{2}})^{\dagger} & (k = 2\ell + 1 \leq 2L + 1), \\ R_{L+2}(\theta_{L+2}) \rho_{k-1} R_{L+2}(\theta_{L+2})^{\dagger} & (k = 2L + 2). \end{cases} \quad (110)$$

190 Thus,  $\rho_k$  is parameterized by  $\{\theta_1, \dots, \theta_p\}$ , where  $p = \ell$  if  $k = 2\ell \leq 2L$ ,  $p = \ell + 1$  if  $k = 2\ell + 1 \leq$   
191  $2L + 1$ , and  $p = L + 2$  if  $k = 2L + 2$ .

192 Next, rewrite the formulation of Eq. (108) in detail:

$$\begin{aligned} & \mathbb{E}_{\theta_1} \dots \mathbb{E}_{\theta_{L+2}} \left( \frac{\partial}{\partial \theta_{q,n}} \text{Tr}[\sigma_i V(\theta) \rho_{\text{in}} V(\theta)^{\dagger}] \right)^2 \\ &= \mathbb{E}_{\theta_1} \dots \mathbb{E}_{\theta_{L+2}} \left( \frac{\partial}{\partial \theta_{q,n}} \text{Tr}[\sigma_i \rho_{2L+2}] \right)^2 \end{aligned} \quad (111)$$

$$\geq [4\gamma^2(1-4\gamma^2)]^{S_1} (1-4\gamma^2)^{S_3} \mathbb{E}_{\theta_1} \cdots \mathbb{E}_{\theta_{L+1}} \left( \frac{\partial}{\partial \theta_{q,n}} \text{Tr} [\sigma_{\mathbf{3}|\mathbf{i};1} \rho_{2L+1}] \right)^2 \quad (112)$$

$$\geq [4\gamma^2(1-4\gamma^2)]^{S_1+S_2} (1-4\gamma^2)^{S_1+2S_3} \mathbb{E}_{\theta_1} \cdots \mathbb{E}_{\theta_L} \left( \frac{\partial}{\partial \theta_{q,n}} \text{Tr} [\sigma_{\mathbf{3}|\mathbf{i}} \rho_{2L}] \right)^2 \quad (113)$$

$$\geq [4\gamma^2(1-4\gamma^2)]^S (1-4\gamma^2)^S \mathbb{E}_{\theta_1} \cdots \mathbb{E}_{\theta_L} \left( \frac{\partial}{\partial \theta_{q,n}} \text{Tr} [\sigma_{\mathbf{3}|\mathbf{i}} \rho_{2L}] \right)^2, \quad (114)$$

193 where  $\mathbf{3}|\mathbf{i}$  denotes the index by replacing non-zero elements of  $\mathbf{i} = (i_1, \dots, i_N)$  with 3 and  $\mathbf{3}|\mathbf{i}; 1$   
 194 denotes the index by replacing non-zero elements of  $\mathbf{i} = (i_1, \dots, i_N)$  with 3 if the original value  
 195 is 1. We refer to  $S_1$ ,  $S_2$ , and  $S_3$  as the number of 1, 2, and 3 in the index  $\mathbf{i}$ , respectively. Eq. (111)  
 196 is obtained by using the notation  $\rho_{2L+2}$  defined in (110). We obtain Eqs. (112) and (113) by using  
 197 Lemma B.1 for the  $R_Y$  and  $R_X$  gate case, respectively. InEq. (114) follows from  $S = S_1 + S_2 + S_3$ .  
 198 Then, we proceed from Eq. (114) and take the expectation for parameters in  $(\theta_L, \dots, \theta_{q+1})$ .

$$\text{Eq. (114)} = [2\gamma(1-4\gamma^2)]^{2S} \mathbb{E}_{\theta_1} \cdots \mathbb{E}_{\theta_L} \left( \frac{\partial}{\partial \theta_{q,n}} \text{Tr} [\sigma_{\mathbf{3}|\mathbf{i}} \text{CZ}_L R_L(\theta_L) \rho_{2L-2} R_L(\theta_L)^\dagger \text{CZ}_L^\dagger] \right)^2 \quad (115)$$

$$= [2\gamma(1-4\gamma^2)]^{2S} \mathbb{E}_{\theta_1} \cdots \mathbb{E}_{\theta_L} \left( \frac{\partial}{\partial \theta_{q,n}} \text{Tr} [\sigma_{\mathbf{3}|\mathbf{i}} R_L(\theta_L) \rho_{2L-2} R_L(\theta_L)^\dagger] \right)^2 \quad (116)$$

$$\geq [2\gamma(1-4\gamma^2)]^{2S} (1-4\gamma^2)^S \mathbb{E}_{\theta_1} \cdots \mathbb{E}_{\theta_{L-1}} \left( \frac{\partial}{\partial \theta_{q,n}} \text{Tr} [\sigma_{\mathbf{3}|\mathbf{i}} \rho_{2L-2}] \right)^2 \quad (117)$$

$$\geq [2\gamma(1-4\gamma^2)]^{2S} (1-4\gamma^2)^{(L-q)S} \mathbb{E}_{\theta_1} \cdots \mathbb{E}_{\theta_q} \left( \frac{\partial}{\partial \theta_{q,n}} \text{Tr} [\sigma_{\mathbf{3}|\mathbf{i}} \rho_{2q}] \right)^2. \quad (118)$$

Eq. (115) follows from the definition of  $\rho_{2L}$  (110). Eq. (116) is obtained since

$$\text{CZ}(\sigma_j \otimes \sigma_k) \text{CZ}^\dagger = \sigma_j \otimes \sigma_k, \forall j, k \in \{0, 3\}.$$

199 InEq. (117) is derived by using the Lemma B.1. We repeat the derivation in Eqs. (115-117) inductively  
 200 for parameters  $(\theta_L, \dots, \theta_{q+1})$ , which yields InEq. (118).

201 Next, we consider the expectation with respect to  $\theta_q$ . We have

$$\begin{aligned} \text{Eq. (118)} &= [2\gamma(1-4\gamma^2)]^{2S} (1-4\gamma^2)^{(L-q)S} \mathbb{E}_{\theta_1} \cdots \mathbb{E}_{\theta_q} \left( \frac{\partial}{\partial \theta_{q,n}} \text{Tr} [\sigma_{\mathbf{3}|\mathbf{i}} \rho_{2q-1}] \right)^2 \\ &\geq [2\gamma(1-4\gamma^2)]^{2S} (1-4\gamma^2)^{(L-q)S} (1-4\gamma^2)^{S-1} [4\gamma^2(1-4\gamma^2)] 4 \mathbb{E}_{\theta_1} \cdots \mathbb{E}_{\theta_{q-1}} \text{Tr} [\sigma_{\mathbf{3}|\mathbf{i}} \rho_{2q-2}]^2, \end{aligned} \quad (119)$$

202 where expectations with respect to parameters  $\{\theta_{q,j}\}_{j \in I_S, j \neq n}$  are calculated via Lemma B.1 and the  
 203 expectation with respect to  $\theta_{q,n}$  is calculated via Lemma B.2.

204 Finally we proceed from Eq. (119) and take the expectation for parameters in  $(\theta_{q-1}, \dots, \theta_1)$ . We  
 205 have

$$\mathbb{E}_{\theta_1} \cdots \mathbb{E}_{\theta_{q-1}} \text{Tr} [\sigma_{\mathbf{3}|\mathbf{i}} \rho_{2q-2}]^2 = \mathbb{E}_{\theta_1} \cdots \mathbb{E}_{\theta_{q-1}} \text{Tr} [\sigma_{\mathbf{3}|\mathbf{i}} \text{CZ}_{q-1} R_{q-1}(\theta_{q-1}) \rho_{2q-4} R_{q-1}(\theta_{q-1})^\dagger \text{CZ}_{q-1}^\dagger]^2 \quad (120)$$

$$= \mathbb{E}_{\theta_1} \cdots \mathbb{E}_{\theta_{q-1}} \text{Tr} [\sigma_{\mathbf{3}|\mathbf{i}} R_{q-1}(\theta_{q-1}) \rho_{2q-4} R_{q-1}(\theta_{q-1})^\dagger]^2 \quad (121)$$

$$\geq (1-4\gamma^2)^S \mathbb{E}_{\theta_1} \cdots \mathbb{E}_{\theta_{q-2}} \text{Tr} [\sigma_{\mathbf{3}|\mathbf{i}} \rho_{2q-4}]^2 \quad (122)$$

$$\geq (1-4\gamma^2)^{(q-1)S} \text{Tr} [\sigma_{\mathbf{3}|\mathbf{i}} \rho_0]^2. \quad (123)$$

Eq. (120) is derived by using the definition of  $\rho_{2q-2}$ . Eq. (121) is obtained since

$$\text{CZ}(\sigma_j \otimes \sigma_k) \text{CZ}^\dagger = \sigma_j \otimes \sigma_k, \forall j, k \in \{0, 3\}.$$

206 InEq. (122) is derived by using Lemma B.1. We repeat the derivation in Eqs. (120-122) inductively  
 207 for parameters  $(\theta_{q-1}, \dots, \theta_1)$ , which yields InEq. (123). Employing Eq. (123) to Eq. (119) yields

$$\text{Eq. (118)} \geq 4(4\gamma^2)^{S+1} (1 - 4\gamma^2)^{S(L+2)} \text{Tr}[\sigma_{\mathbf{3}|i}\rho_0]^2 \quad (124)$$

$$= 4 \left( \frac{1}{S(L+2)} \right)^{S+1} \left( 1 - \frac{1}{S(L+2)} \right)^{S(L+2)} \text{Tr}[\sigma_{\mathbf{3}|i}\rho_0]^2 \quad (125)$$

$$\geq 4 \left( \frac{1}{S(L+2)} \right)^{S+1} \left( 1 - \frac{1}{2} \right)^2 \text{Tr}[\sigma_{\mathbf{3}|i}\rho_0]^2 \quad (126)$$

$$= \frac{1}{S^{S+1}(L+2)^{S+1}} \text{Tr}[\sigma_{\mathbf{3}|i}\rho_0]^2. \quad (127)$$

208 Eq. (125) is derived by using the condition  $\gamma^2 = \frac{1}{4S(L+2)}$ . Eq. (126) is obtained by noticing that  
 209 function  $g(x) = (1 - \frac{1}{x})^x$  is monotonically increasing when  $x \geq 2$ . Thus, we have proved Eq. (108).  
 210 □

## 211 **D Proof of Theorem 4.2**

212 *Proof.* To begin with, we define several notations for convenience. Denote by  $\rho_j$  the state after the  
 213  $j$ -th parameterized operator, i.e.

$$\rho_j(\theta_1, \dots, \theta_j) = \left( \prod_{i=j}^1 V_i(\theta_i) \right) \rho_{\text{in}} \left( \prod_{i=1}^j V_i(\theta_i)^\dagger \right). \quad (128)$$

214 Denote by  $O_j$  the observable, i.e.

$$O_j = V_j(0)^\dagger \dots V_L(0)^\dagger O V_L(0) \dots V_j(0), \quad \forall j \in \{1, \dots, L\}. \quad (129)$$

215 Now we begin to prove the Theorem. First, we remark that  $\forall j \in [L]$ , the  $a_j \neq 1$  case can be  
 216 converted to the  $a_j = 1$  case by using the transformation

$$\theta'_j = \frac{\theta_j}{a_j},$$

217 where the variance of the new and the old parameter satisfies

$$\text{Var}[\theta'_j] = \frac{1}{a_j^2} \text{Var}[\theta_j].$$

218 In the following proof, we assume that  $a_j = 1, \forall j \in [L]$ . By using the parameter-shift rule,  $\frac{\partial f}{\partial \theta_\ell}$   
 219 could be written as the linear sum of  $2h$  expectations on the observable  $O$  with coefficients  $\pm 1$ . Then  
 220 for the case  $\ell \leq L-1$ , we have

$$\mathbb{E}_\theta \left( \frac{\partial f}{\partial \theta_\ell} \right)^2 = \mathbb{E}_{\theta_1} \dots \mathbb{E}_{\theta_L} \left( \frac{\partial}{\partial \theta_\ell} \text{Tr} [O V_L(\theta_L) \rho_{L-1} V_L(\theta_L)^\dagger] \right)^2 \quad (130)$$

$$\geq \mathbb{E}_{\theta_1} \dots \mathbb{E}_{\theta_{L-1}} \left( \frac{\partial}{\partial \theta_\ell} \text{Tr} [O V_L(0) \rho_{L-1} V_L(0)^\dagger] \right)^2 - [12h_L(h_L - 1) + 4] 4h_L^2 \gamma_L^2 \|O\|_2^2 \quad (131)$$

$$= \mathbb{E}_{\theta_1} \dots \mathbb{E}_{\theta_{L-1}} \left( \frac{\partial}{\partial \theta_\ell} \text{Tr} [O_L \rho_{L-1}] \right)^2 - [12h_L(h_L - 1) + 4] 4h_L^2 \gamma_L^2 \|O\|_2^2 \quad (132)$$

$$= \mathbb{E}_{\theta_1} \dots \mathbb{E}_{\theta_{L-1}} \left( \frac{\partial f}{\partial \theta_\ell}(\theta_1, \dots, \theta_{L-1}, 0) \right)^2 - [12h_L(h_L - 1) + 4] 4h_L^2 \gamma_L^2 \|O\|_2^2, \quad (133)$$

221 where Eq. (130) follows from the definition of  $\rho_j$  in Eq. (128). InEq. (131) is obtained by using  
 222 Lemma B.3, where  $\|c\|_1 = 2h$ . Eq. (132) follows from the definition of  $O_j$  in Eq. (129). Eq. (133)

follows from the formulation  $f(\theta) = \text{Tr}[O\rho(\theta)]$ . By proceeding the derivation (130-133) for  $L - \ell$  times, we have

$$\begin{aligned}
\mathbb{E}_{\theta} \left( \frac{\partial f}{\partial \theta_{\ell}} \right)^2 &\geq \mathbb{E}_{\theta_1} \cdots \mathbb{E}_{\theta_{\ell}} \left( \frac{\partial f}{\partial \theta_{\ell}}(\theta_1, \dots, \theta_{\ell}, 0, \dots, 0) \right)^2 - \sum_{j=\ell+1}^L [12h_j(h_j - 1) + 4] 4h_j^2 \gamma_j^2 \|O\|_2^2 \\
&= \mathbb{E}_{\theta_1} \cdots \mathbb{E}_{\theta_{\ell}} \left( \frac{\partial}{\partial \theta_{\ell}} \text{Tr} [O_{\ell+1} V_{\ell}(\theta_{\ell}) \rho_{\ell-1} V_{\ell}(\theta_{\ell})^{\dagger}] \right)^2 - \sum_{j=\ell+1}^L [12h_j(h_j - 1) + 4] 4h_j^2 \gamma_j^2 \|O\|_2^2 \quad (134) \\
&\geq \mathbb{E}_{\theta_1} \cdots \mathbb{E}_{\theta_{\ell-1}} (1 - 4\gamma_{\ell}^2) \left( \frac{\partial}{\partial \theta_{\ell}} \text{Tr} [O_{\ell+1} V_{\ell}(\theta_{\ell}) \rho_{\ell-1} V_{\ell}(\theta_{\ell})^{\dagger}] \right)^2 \Big|_{\theta_{\ell}=0} - 96h_{\ell}^2(h_{\ell} - 1)\gamma_{\ell}^2 \|O\|_2^2 \\
&\quad - 20h_{\ell}^2(h_{\ell} - 1)(h_{\ell} - 2)\gamma_{\ell}^2 \|O\|_2^2 - \sum_{j=\ell+1}^L [12h_j(h_j - 1) + 4] 4h_j^2 \gamma_j^2 \|O\|_2^2 \quad (135) \\
&\geq \mathbb{E}_{\theta_1} \cdots \mathbb{E}_{\theta_{\ell-1}} \left( \frac{\partial f}{\partial \theta_{\ell}}(\theta_1, \dots, \theta_{\ell-1}, 0, 0, \dots, 0) \right)^2 - 4\gamma_{\ell}^2 (2h_{\ell})^2 \|O\|_2^2 - 96h_{\ell}^2(h_{\ell} - 1)\gamma_{\ell}^2 \|O\|_2^2 \\
&\quad - 20h_{\ell}^2(h_{\ell} - 1)(h_{\ell} - 2)\gamma_{\ell}^2 \|O\|_2^2 - \sum_{j=\ell+1}^L [12h_j(h_j - 1) + 4] 4h_j^2 \gamma_j^2 \|O\|_2^2, \quad (136)
\end{aligned}$$

where Eq. (134) follows from definitions  $\rho_j$  (128) and  $O_j$  (129). InEq. (135) is derived by using Lemma B.4. InEq. (136) follows from the parameter-shift rule. We proceed from InEq. (136) by employing the derivation (130-133) for parameters  $(\theta_{\ell-1}, \dots, \theta_1)$ , which yields

$$\begin{aligned}
&\mathbb{E}_{\theta} \left( \frac{\partial f}{\partial \theta_{\ell}} \right)^2 \\
&\geq \left( \frac{\partial f}{\partial \theta_{\ell}} \right)^2 \Big|_{\mathbf{0}} - \sum_{j=1}^{\ell-1} 16h_j^2 [3h_j(h_j - 1) + 1] \gamma_j^2 \|O\|_2^2 - \sum_{j=\ell+1}^L 16h_j^2 [3h_j(h_j - 1) + 1] \gamma_j^2 \|O\|_2^2 \\
&\quad - 16h_{\ell}^2 \gamma_{\ell}^2 \|O\|_2^2 - 96h_{\ell}^2(h_{\ell} - 1)\gamma_{\ell}^2 \|O\|_2^2 - 20h_{\ell}^2(h_{\ell} - 1)(h_{\ell} - 2)\gamma_{\ell}^2 \|O\|_2^2 \quad (137) \\
&\geq \left( \frac{\partial f}{\partial \theta_{\ell}} \right)^2 \Big|_{\mathbf{0}} - \sum_{j=1}^L 16h_j^2 [3h_j(h_j - 1) + 1] \gamma_j^2 \|O\|_2^2 \\
&\geq (1 - \epsilon) \left( \frac{\partial f}{\partial \theta_{\ell}} \right)^2 \Big|_{\mathbf{0}}. \quad (138)
\end{aligned}$$

InEq. (137) is obtained by using Lemma B.3, where  $\|c\|_1 = 2h$ . InEq. (138) follows from the condition  $\gamma_j^2 \leq \frac{a_j^2 \epsilon}{16h_j^2(3h_j(h_j-1)+1)L\|O\|_2^2} \left( \frac{\partial f}{\partial \theta_{\ell}} \right)^2 \Big|_{\theta=0}$  and  $a_j = 1, \forall j \in [L]$ . Thus, we have proved the theorem.  $\square$

## References

- [1] Ilya Sutskever, James Martens, George Dahl, and Geoffrey Hinton. On the importance of initialization and momentum in deep learning. In *Proceedings of the 30th International Conference on Machine Learning*, volume 28 of *Proceedings of Machine Learning Research*, pages 1139–1147, Atlanta, Georgia, USA, 17–19 Jun 2013. PMLR.
- [2] Y Nesterov. A method of solving a convex programming problem with convergence rate  $\mathcal{O}(1/k^2)$ . In *Sov. Math. Dokl*, volume 27.
- [3] John Duchi, Elad Hazan, and Yoram Singer. Adaptive subgradient methods for online learning and stochastic optimization. *Journal of Machine Learning Research*, 12(61):2121–2159, 2011.
